# Supplementary material for: Synthesis of α-ketoamides via oxidative amidation of diazo compounds with O-benzoyl hydroxylamines as nitrogen source and the oxidant
Source: Royal Society of Chemistry journal article supplement (doi:10.1039/d4ob00883a), 2024-01-01
Supplement: d4ob00883a1.pdf [file d4ob00883a1.pdf]

*supporting information for*

**Synthesis of  $\alpha$ -ketoamides via oxidative amidation of Diazo Compounds with *O*-  
benzoyl hydroxylamines as Nitrogen Source and Oxidant**

Wenwen Chen,<sup>\* a</sup> Xinyin Zhang,<sup>a</sup> Xinyu Wang,<sup>a</sup> EnXuan Zhang,<sup>c</sup> Zuli Wang,<sup>\*b</sup> and Jianfeng Jia<sup>\*</sup>

<sup>a</sup>

Table of Contents

|                                                                       |        |
|-----------------------------------------------------------------------|--------|
| 1. General information -----                                          | S2     |
| 2. Effect of solvent on the reaction -----                            | S2     |
| 3. General procedure for 1-morpholino-2-phenylethane-1, 2-dione ----- | S2     |
| 4. Characterization of the products-----                              | S3-S8  |
| 5. Copies of <sup>1</sup> H and <sup>13</sup> C NMR spectra-----      | S9-S24 |
| 6. References-----                                                    | S25    |

## 1. General information

Unless otherwise stated, all commercial reagents were used without additional purification. Column chromatography was undertaken on silica gel (200-300 mesh) using a proper eluent system.  $^1\text{H}$  NMR, and  $^{13}\text{C}$  NMR spectra were recorded on a spectrometer at 600 MHz, with deuterated chloroform as solvent. The chemical shifts  $\delta$  are reported in ppm relative to tetramethylsilane ( $\delta = 0$  ppm) or residual  $\text{CHCl}_3$  ( $\delta = 77.00$  ppm). The following abbreviations were used to describe peak splitting patterns when appropriate: *s* (singlet), *d* (doublet), *t* (triplet), *q* (quartet), *m* (multiplet), Coupling constants *J* are reported in Hertz (Hz). High-resolution mass spectrometry (HRMS) was performed on a Bruker Impact II spectrometer using electrospray ionization (ESI).

## 2. Effect of solvent on the reaction

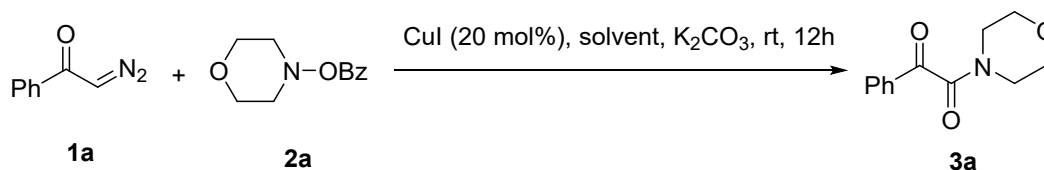

Table S1 Influence of solvent on reaction <sup>a</sup>

| Entry           | Solvent          | Base                           | Temp (°C) | Time(h) | Yield (%) <sup>c</sup> |
|-----------------|------------------|--------------------------------|-----------|---------|------------------------|
| 1               | EtOH             | K <sub>2</sub> CO <sub>3</sub> | rt        | 12      | NR                     |
| 2               | DMF              | K <sub>2</sub> CO <sub>3</sub> | rt        | 12      | 5                      |
| 3               | NMP              | K <sub>2</sub> CO <sub>3</sub> | rt        | 12      | Trace                  |
| 4               | DCM              | K <sub>2</sub> CO <sub>3</sub> | rt        | 12      | NR                     |
| 5               | Toluene          | K <sub>2</sub> CO <sub>3</sub> | rt        | 12      | Trace                  |
| 6               | MeCN             | K <sub>2</sub> CO <sub>3</sub> | rt        | 12      | 31                     |
| 7               | H <sub>2</sub> O | K <sub>2</sub> CO <sub>3</sub> | rt        | 12      | 7.2                    |
| 8               | THF              | K <sub>2</sub> CO <sub>3</sub> | rt        | 12      | 26.2                   |
| 9               | DCE              | K <sub>2</sub> CO <sub>3</sub> | rt        | 12      | 9.6                    |
| 10              | EtOAc            | K <sub>2</sub> CO <sub>3</sub> | rt        | 12      | Trace                  |
| 11              | 4-Bromoanisole   | K <sub>2</sub> CO <sub>3</sub> | rt        | 12      | trace                  |
| 12 <sup>b</sup> | MeCN             | K <sub>2</sub> CO <sub>3</sub> | rt        | 12      | 32                     |
| 13 <sup>c</sup> | MeCN             | K <sub>2</sub> CO <sub>3</sub> | rt        | 12      | 39                     |
| 14 <sup>d</sup> | MeCN             | K <sub>2</sub> CO <sub>3</sub> | rt        | 12      | 20                     |

<sup>a</sup> Reactions run using 0.5 mmol of α-Carbonyl 2-diazo-1-phenylethan-1-one, 0.6 mmol of morpholino benzoate, 1.0 mmol base, 20 mol % of CuI, solvent 1 mL at room temperature for 12 h;

<sup>b</sup> solvent 1.5 ml; <sup>c</sup> solvent 2 ml; <sup>d</sup> solvent 2.5 ml; <sup>e</sup> Isolated yields.

## 3. General procedure for 1-morpholino-2-phenylethane-1,2-dione

The experimental procedure involved the synthesis of  $\alpha$ -ketoamides through the reaction of 2-diazo-1-phenylethan-1-one with morpholino-4-benzoate. Specifically, 2-diazo-1-phenylethan-1-one (72 mg, 0.5 mmol), morpholino-4-benzoate (207mg, 1mmol),  $K_2CO_3$  (138mg, 1mmol) and CuI (20 mg) were added to a 10 mL Schlenk tube. The system was subjected to three pumping-charging cycles for  $N_2$  atmosphere. Then MeCN (2 mL) were injected and the resulting mixture was stirred under 40 °C (oil bath) for 12 hours. At the end of the reaction, the reaction mixture was directly purified by a silica gel column chromatography (PE:EtOAc=5:1) without any treatment to give the products. Furthermore, the structure of the product were determined by  $^1H$  NMR spectra and  $^{13}C$  NMR data. The  $^{18}O$  content in the product is determined by performing HRMS on the isolated product by a silica gel column chromatography.

#### 4. Characterization of the products

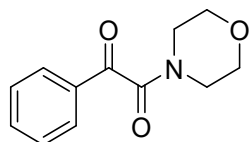

**3a** 1-morpholino-2-phenylethane-1,2-dione : Yellow oil (105.4 mg, 96% yield),  $^1H$  NMR (600 MHz,  $CDCl_3$ )  $\delta$  7.97 (d,  $J$  = 7.1 Hz, 2H), 7.66 (t,  $J$  = 7.4 Hz, 1H), 7.53 (t,  $J$  = 7.8 Hz, 2H), 3.80 (s, 4H), 3.67 – 3.65 (t,  $J$  = 4.8 Hz, 2H), 3.40 – 3.37 (t,  $J$  = 4.8 Hz, 2H).  $^{13}C$  NMR (151 MHz,  $CDCl_3$ )  $\delta$  191.18, 165.47, 134.97, 133.06, 129.69, 129.12, 66.75, 66.68, 46.28, 41.64.

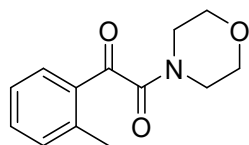

**3b** 1-morpholino-2-(o-tolyl)ethane-1,2-dione : Yellow oil (83.8mg, 72% yield),  $^1H$  NMR (600 MHz,  $CDCl_3$ )  $\delta$  7.74 – 7.71 (d,  $J$  = 6Hz, 1H), 7.50 (t,  $J$  = 7.5 Hz, 1H), 7.33 (dd,  $J$  = 14.1, 7.5 Hz, 2H), 3.79 (d,  $J$  = 6.5 Hz, 4H), 3.69 – 3.66 (t,  $J$  = 6Hz, 2H), 3.41 – 3.39 (t,  $J$  = 12Hz, 2H), 2.67 (s, 3H).  $^{13}C$  NMR (151 MHz,  $CDCl_3$ )  $\delta$  193.12, 166.21, 141.67, 133.90, 132.74, 132.71, 131.52, 126.24, 66.70, 66.67, 46.30, 41.65, 21.86, 21.84.

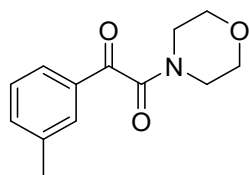

**3c** 1-morpholino-2-(m-tolyl)ethane-1,2-dione : Yellow oil (90.5 mg, 78% yield),  $^1\text{H}$  NMR (600 MHz,  $\text{CDCl}_3$ )  $\delta$  7.76 (d,  $J = 9.2$  Hz, 2H), 7.47 (d,  $J = 7.6$  Hz, 1H), 7.41 (t,  $J = 7.6$  Hz, 1H), 3.80 (d,  $J = 1.4$  Hz, 4H), 3.67 – 3.64 (t,  $J = 6$  Hz, 2H), 3.39 – 3.37 (t,  $J = 12$  Hz, 2H), 2.43 (s, 3H).  $^{13}\text{C}$  NMR (151 MHz,  $\text{CDCl}_3$ )  $\delta$  191.41, 165.61, 139.10, 135.81, 133.09, 129.96, 129.00, 127.01, 66.75, 66.69, 46.28, 41.62, 21.29.

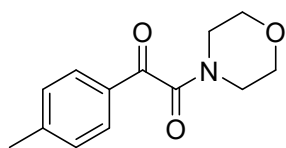

**3d** 1-morpholino-2-(p-tolyl)ethane-1,2-dione : Yellow solid (103.5 mg, 89% yield), m.p. = 47-49°C<sup>[1]</sup>.  $^1\text{H}$  NMR (600 MHz,  $\text{CDCl}_3$ )  $\delta$  7.86 (d,  $J = 8.2$  Hz, 2H), 7.32 (d,  $J = 8.0$  Hz, 2H), 3.81 – 3.78 (d,  $J = 6$  Hz, 4H), 3.66 – 3.64 (t,  $J = 12$  Hz, 2H), 3.39 – 3.36 (t,  $J = 6$  Hz, 2H), 2.44 (s, 3H).  $^{13}\text{C}$  NMR (151 MHz,  $\text{CDCl}_3$ )  $\delta$  190.91, 165.68, 146.28, 130.69, 129.83, 129.81, 66.77, 66.70, 46.28, 41.59, 21.93.

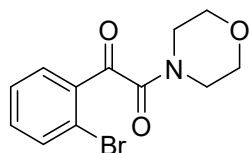

**3e** 1-(2-bromophenyl)-2-morpholinoethane-1,2-dione : Yellow solid (53.9 mg, 36% yield), m.p. = 122-126°C<sup>[2]</sup>.  $^1\text{H}$  NMR (600 MHz,  $\text{CDCl}_3$ )  $\delta$  7.81 (dd,  $J = 7.6, 1.8$  Hz, 1H), 7.64 (dd,  $J = 7.8, 1.1$  Hz, 1H), 7.44 (dtd,  $J = 17.1, 7.4, 1.5$  Hz, 2H), 3.82 – 3.80 (t,  $J = 12$  Hz, 2H), 3.79 – 3.77 (t,  $J = 12$  Hz, 2H), 3.75 – 3.72 (t,  $J = 12$  Hz, 2H), 3.59 – 3.56 (t,  $J = 6$  Hz, 2H).  $^{13}\text{C}$  NMR (151 MHz,  $\text{CDCl}_3$ )  $\delta$  190.43, 164.84, 135.51, 134.26, 134.05, 132.68, 127.87, 121.48, 66.31, 66.26, 46.31, 42.06.

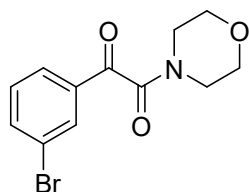

**3f** 1-(3-bromophenyl)-2-morpholinoethane-1,2-dione : Yellow solid (119.4 mg, 80% yield), m.p. = 90 -93°C<sup>[2]</sup>.  $^1\text{H}$  NMR (600 MHz,  $\text{CDCl}_3$ )  $\delta$  8.10 (s, 1H), 7.89 (d,  $J = 7.8$

Hz, 1H), 7.78 (dd,  $J = 8.0, 0.8$  Hz, 1H), 7.41 (t,  $J = 7.9$  Hz, 1H), 3.80 (d,  $J = 4.0$  Hz, 4H), 3.69 – 3.66 (t,  $J = 6$ Hz, 2H), 3.40 – 3.38 (t,  $J = 12$ Hz, 2H).  $^{13}\text{C}$  NMR (151 MHz,  $\text{CDCl}_3$ )  $\delta$  189.49, 164.64, 137.75, 134.87, 132.41, 131.57, 130.65, 128.33, 123.38, 66.74, 66.66, 46.31, 41.78.

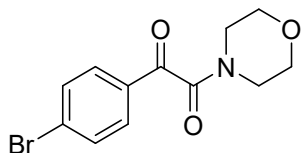

**3g** 1-(4-bromophenyl)-2-morpholinoethane-1,2-dione : Yellow solid (128.3 mg, 86% yield), m.p. = 121-124°C<sup>[3]</sup>.  $^1\text{H}$  NMR (600 MHz,  $\text{CDCl}_3$ )  $\delta$  7.83 (d,  $J = 8.6$  Hz, 2H), 7.67 (d,  $J = 8.6$  Hz, 2H), 3.79 (d,  $J = 3.7$  Hz, 4H), 3.68 – 3.65 (t,  $J = 6$ Hz, 2H), 3.40 – 3.37 (t,  $J = 6$ Hz, 2H).  $^{13}\text{C}$  NMR (151 MHz,  $\text{CDCl}_3$ )  $\delta$  189.91, 164.87, 132.51, 131.90, 131.07, 130.51, 66.76, 66.66, 46.31, 41.74.

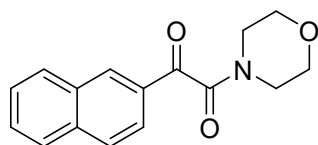

**3h** 1-morpholino-2-(naphthalen-2-yl)ethane-1,2-dione : Yellow solid (108.5 mg, 80% yield), m.p. = 116-119°C<sup>[4]</sup>.  $^1\text{H}$  NMR (600 MHz,  $\text{CDCl}_3$ )  $\delta$  8.47 (s, 1H), 8.03 (dd,  $J = 8.6, 1.7$  Hz, 1H), 7.99 (d,  $J = 8.2$  Hz, 1H), 7.95 (d,  $J = 8.6$  Hz, 1H), 7.90 (d,  $J = 8.2$  Hz, 1H), 7.67 – 7.64 (t,  $J = 18$  Hz, 1H), 7.60 – 7.57 (m,  $J = 18$  Hz, 1H), 3.85 (s, 4H), 3.68 – 3.66 (t,  $J = 12$  Hz, 2H), 3.44 – 3.41 (t,  $J = 6$  Hz, 2H).  $^{13}\text{C}$  NMR (151 MHz,  $\text{CDCl}_3$ )  $\delta$  191.25, 165.62, 136.46, 133.08, 132.45, 130.45, 129.94, 129.58, 129.22, 128.00, 127.26, 123.60, 66.79, 66.73, 46.39, 41.75.

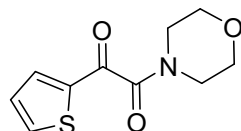

**3i** 1-morpholino-2-(thiophen-2-yl)ethane-1,2-dione : Yellow oil (70.7mg, 63% yield),  $^1\text{H}$  NMR (600 MHz,  $\text{CDCl}_3$ )  $\delta$  7.85 (dd,  $J = 3.8, 1.1$  Hz, 1H), 7.82 (dd,  $J = 4.9, 1.1$  Hz, 1H), 7.20 (t,  $J = 12$ Hz, 1H), 3.80 – 3.78 (m, 2H), 3.77 – 3.75 (m, 2H), 3.69 – 3.67 (t,  $J = 6, 2$ H), 3.51 – 3.49 (t,  $J = 6, 2$ H).  $^{13}\text{C}$  NMR (151 MHz,  $\text{CDCl}_3$ )  $\delta$  182.82, 164.34, 140.32, 136.78, 136.29, 128.74, 66.83, 66.65, 46.47, 41.98.

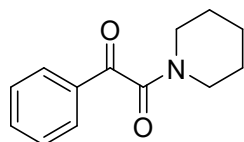

**3j** 1-phenyl-2-(piperidin-1-yl)ethane-1,2-dione : Yellow solid (75 mg, 69% yield), m.p. = 104-105°C<sup>[5]</sup>. <sup>1</sup>H NMR (600 MHz, CDCl<sub>3</sub>) δ 7.95 (d, *J* = 7.1 Hz, 2H), 7.64 (t, *J* = 7.4 Hz, 1H), 7.51 (t, *J* = 7.8 Hz, 2H), 3.71 (s, 2H), 3.31 – 3.28 (t, *J* = 12 Hz, 2H), 1.72 – 1.68 (t, *J* = 6 Hz, 4H), 1.55 (s, 2H). <sup>13</sup>C NMR (151 MHz, CDCl<sub>3</sub>) δ 191.96, 165.46, 134.64, 133.31, 129.59, 129.00, 47.05, 42.17, 26.22, 25.47, 24.41.

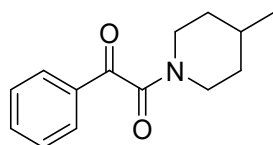

**3k** 1-(4-methylpiperidin-1-yl)-2-phenylethane-1,2-dione : Yellow oil (72.4 mg, 63% yield), <sup>1</sup>H NMR (600 MHz, CDCl<sub>3</sub>) δ 7.95 (d, *J* = 7.1 Hz, 2H), 7.64 (t, *J* = 7.4 Hz, 1H), 7.51 (t, *J* = 7.8 Hz, 2H), 4.63 (d, *J* = 13.2 Hz, 1H), 3.53 (d, *J* = 13.6 Hz, 1H), 3.09 – 3.03 (td, *J* = 18, 6 Hz, 1H), 2.80 (td, *J* = 12.8, 3.1 Hz, 1H), 1.80 (d, *J* = 13.7 Hz, 1H), 1.71 – 1.66 (m, 1H), 1.62 (d, *J* = 13.3 Hz, 1H), 1.27 – 1.24 (m, 1H), 1.18 – 1.11 (m, 1H), 0.98 (d, *J* = 6.5 Hz, 3H). <sup>13</sup>C NMR (151 MHz, CDCl<sub>3</sub>) δ 191.95, 165.45, 134.64, 133.29, 129.58, 129.00, 46.34, 41.53, 34.30, 33.60, 31.06, 21.62.

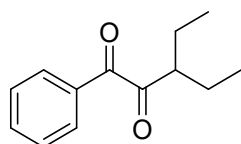

**3l** N,N-diethyl-2-oxo-2-phenylacetamide : Yellow oil (23.6 mg, 23% yield), <sup>1</sup>H NMR (600 MHz, CDCl<sub>3</sub>) δ 7.94 (d, *J* = 7.1 Hz, 2H), 7.64 (t, *J* = 7.4 Hz, 1H), 7.51 (t, *J* = 7.8 Hz, 2H), 3.57 (q, *J* = 7.2 Hz, 2H), 3.24 (q, *J* = 7.1 Hz, 2H), 1.29 (t, *J* = 7.2 Hz, 3H), 1.16 (t, *J* = 7.1 Hz, 3H). <sup>13</sup>C NMR (151 MHz, CDCl<sub>3</sub>) δ 191.60, 166.75, 134.56, 133.30, 129.63, 128.96, 42.12, 38.81, 14.12, 12.85.

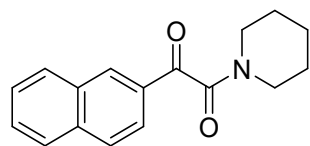

**3m** 1-(naphthalen-2-yl)-2-(piperidin-1-yl)ethane-1,2-dione : Yellow solid (101.4 mg, 89% yield), m.p. = 32.1-37.6°C<sup>[4]</sup>. <sup>1</sup>H NMR (600 MHz, CDCl<sub>3</sub>) δ 8.45 (s, 1H), 8.03 (d,

$J = 8.6$  Hz, 1H), 7.98 (d,  $J = 8.2$  Hz, 1H), 7.95 (d,  $J = 8.6$  Hz, 1H), 7.90 (d,  $J = 8.2$  Hz, 1H), 7.65 (dd,  $J = 8.0, 7.1$  Hz, 1H), 7.58 (t,  $J = 7.5$  Hz, 1H), 3.77 (t,  $J = 5.0$  Hz, 2H), 3.34 – 3.32 (t,  $J = 12$  Hz, 2H), 1.73 (s, 4H), 1.56 (s, 2H).  $^{13}\text{C}$  NMR (151 MHz,  $\text{CDCl}_3$ )  $\delta$  191.04, 164.56, 135.32, 131.78, 131.46, 129.64, 128.85, 128.31, 128.04, 126.93, 126.08, 122.65, 46.13, 41.24, 25.22, 24.50, 23.40.

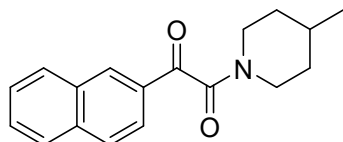

**3n** 1-(4-methylpiperidin-1-yl)-2-(naphthalen-2-yl)ethane-1,2-dione : Yellow oil (87.2 mg, 62% yield),  $^1\text{H}$  NMR (600 MHz,  $\text{CDCl}_3$ )  $\delta$  8.44 (s, 1H), 8.02 (dd,  $J = 8.6, 1.7$  Hz, 1H), 7.97 (d,  $J = 8.2$  Hz, 1H), 7.94 (d,  $J = 8.6$  Hz, 1H), 7.89 (d,  $J = 8.2$  Hz, 1H), 7.66 – 7.62 (td,  $J = 6, 1.7$  Hz, 1H), 7.59 – 7.56 (t,  $J = 18$  Hz, 1H), 4.72 – 4.67 (dt,  $J = 12, 1.7$  Hz, 1H), 3.60 – 3.56 (dt,  $J = 12, 1.7$  Hz, 1H), 3.11 – 3.06 (td,  $J = 12, 6$  Hz, 1H), 2.85 (td,  $J = 12.8, 3.1$  Hz, 1H), 1.83 (d,  $J = 13.5$  Hz, 1H), 1.71 – 1.66 (m, 1H), 1.61 (d,  $J = 13.3$  Hz, 1H), 1.30 (dd,  $J = 12.9, 4.0$  Hz, 1H), 1.17 (ddd,  $J = 24.6, 12.5, 4.3$  Hz, 1H), 0.98 (d,  $J = 6.6$  Hz, 3H).  $^{13}\text{C}$  NMR (151 MHz,  $\text{CDCl}_3$ )  $\delta$  191.02, 164.55, 135.33, 131.78, 131.46, 129.62, 128.85, 128.31, 128.04, 126.93, 126.09, 122.65, 45.42, 40.61, 33.29, 32.63, 30.05, 20.62.

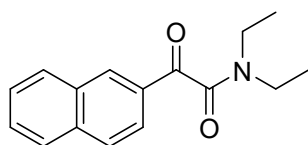

**3o** N,N-diethyl-2-(naphthalen-2-yl)-2-oxoacetamide : Yellow oil (28.4mg, 22% yield),  $^1\text{H}$  NMR (600 MHz,  $\text{CDCl}_3$ )  $\delta$  8.43 (s, 1H), 8.02 (dd,  $J = 8.6, 1.7$  Hz, 1H), 7.97 (d,  $J = 8.2$  Hz, 1H), 7.95 (d,  $J = 8.6$  Hz, 1H), 7.90 (d,  $J = 8.2$  Hz, 1H), 7.65 (ddd,  $J = 8.1, 6.9, 1.2$  Hz, 1H), 7.59 – 7.56 (td,  $J = 6, 1.2$  Hz, 1H), 3.63 (q,  $J = 7.2$  Hz, 2H), 3.29 (q,  $J = 7.1$  Hz, 2H), 1.34 (t,  $J = 7.2$  Hz, 3H), 1.17 (t,  $J = 7.1$  Hz, 3H).  $^{13}\text{C}$  NMR (151 MHz,  $\text{CDCl}_3$ )  $\delta$  190.67, 165.84, 135.29, 131.77, 131.43, 129.63, 128.87, 128.27, 127.98, 126.92, 126.05, 122.77, 41.18, 37.86, 13.15, 11.88.

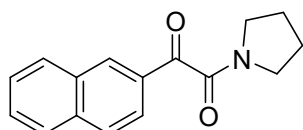

**3p** 1-(naphthalen-2-yl)-2-(pyrrolidin-1-yl)ethane-1,2-dione : Yellow oil (41.4mg, 33% yield),  $^1\text{H}$  NMR (600 MHz,  $\text{CDCl}_3$ )  $\delta$  8.52 (s, 1H), 8.06 (dd,  $J = 8.6, 1.5$  Hz, 1H), 7.98 (d,  $J = 8.2$  Hz, 1H), 7.94 (d,  $J = 8.6$  Hz, 1H), 7.89 (d,  $J = 8.2$  Hz, 1H), 7.64 (dd,  $J = 11.1, 4.0$  Hz, 1H), 7.57 (t,  $J = 7.5$  Hz, 1H), 3.72 (t,  $J = 6.9$  Hz, 2H), 3.47 (t,  $J = 6.6$  Hz, 2H), 2.01 – 1.94 (m, 4H).  $^{13}\text{C}$  NMR (151 MHz,  $\text{CDCl}_3$ )  $\delta$  191.66 , 165.06 , 136.34 , 133.27 , 132.48 , 130.34 , 129.94 , 129.32 , 128.98 , 127.94 , 127.05 , 123.94 , 46.79, 45.35, 25.96, 24.08.

## 5.Copies of $^1\text{H}$ and $^{13}\text{C}$ NMR spectra

**3a** 1-morpholino-2-phenylethane-1,2-dione



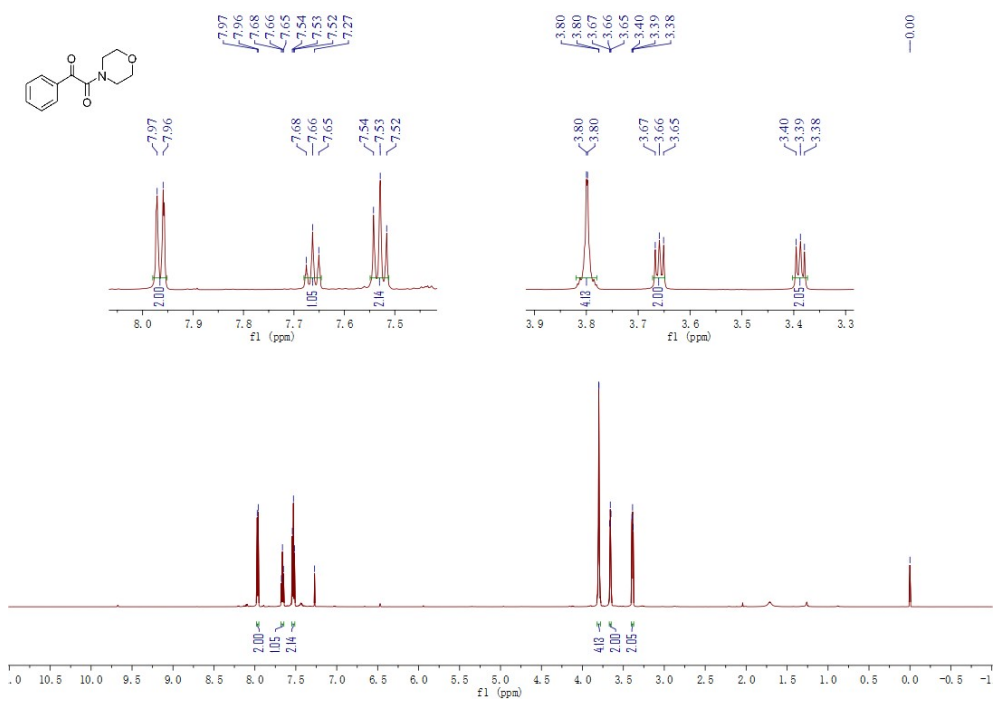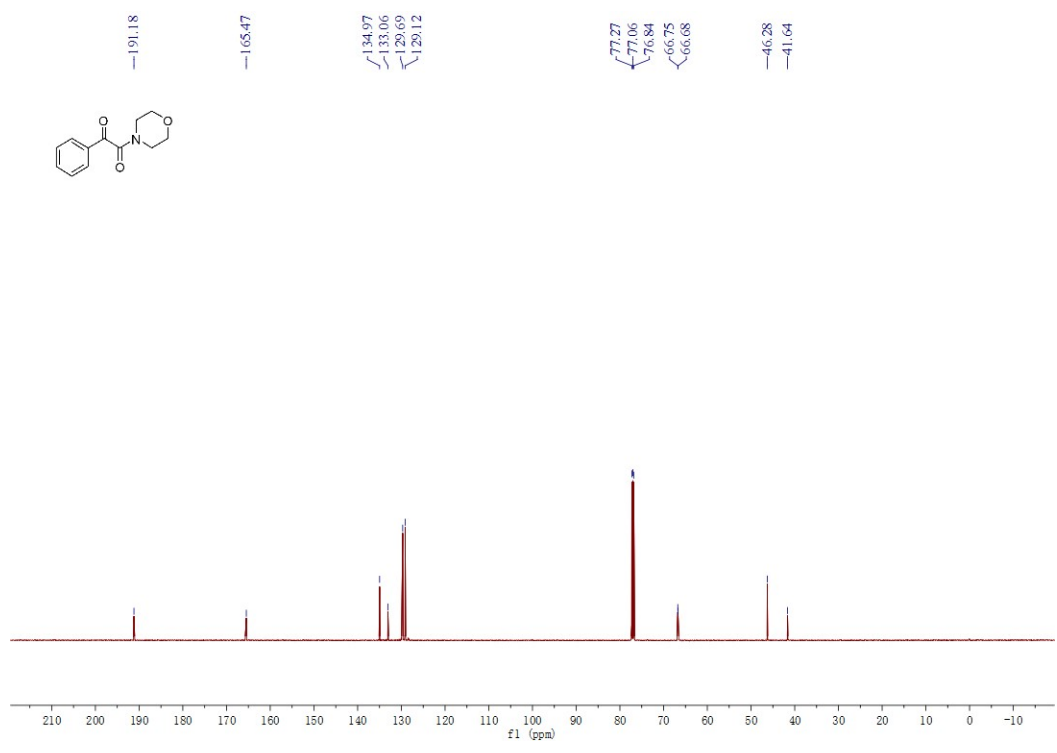

**3b** 1-morpholino-2-(o-tolyl)ethane-1,2-dione

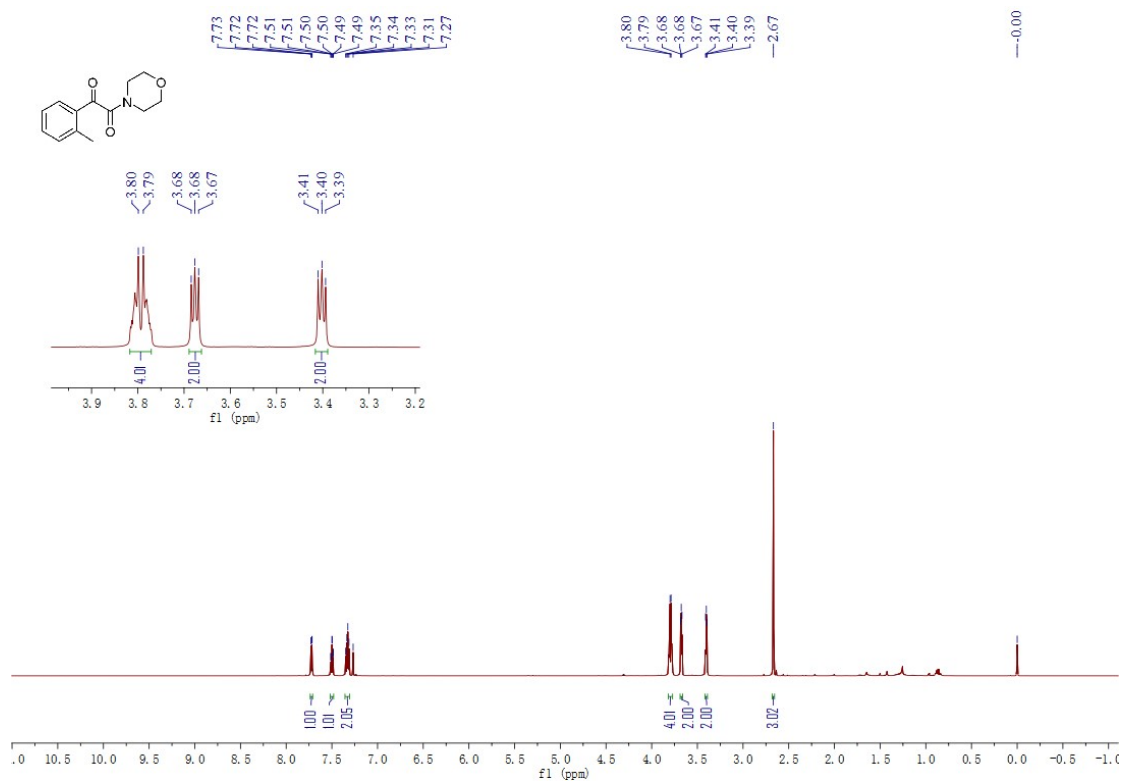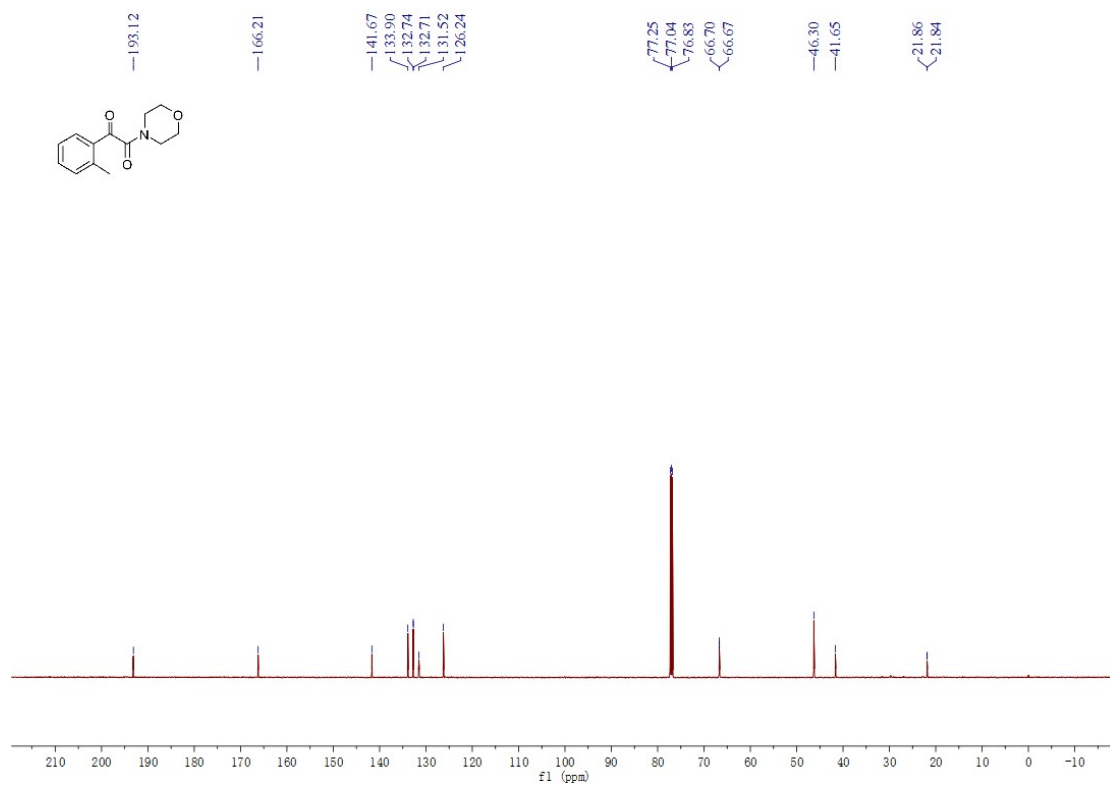

**3c** 1-morpholino-2-(m-tolyl)ethane-1,2-dione

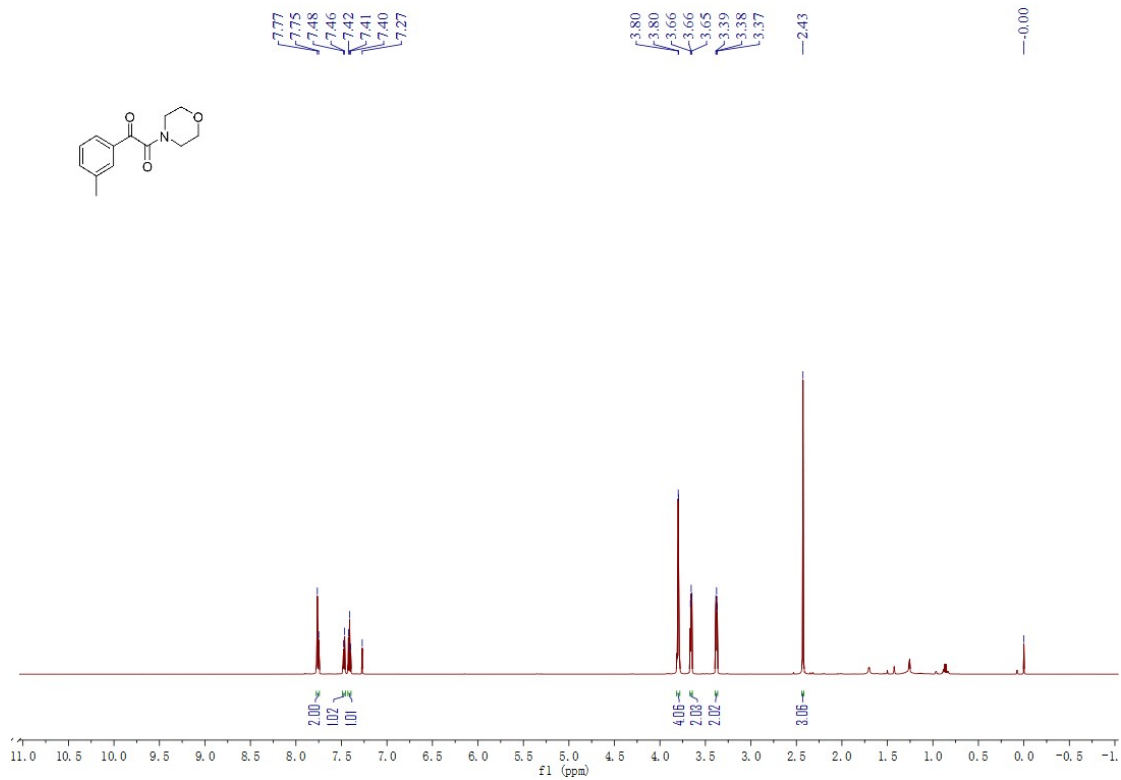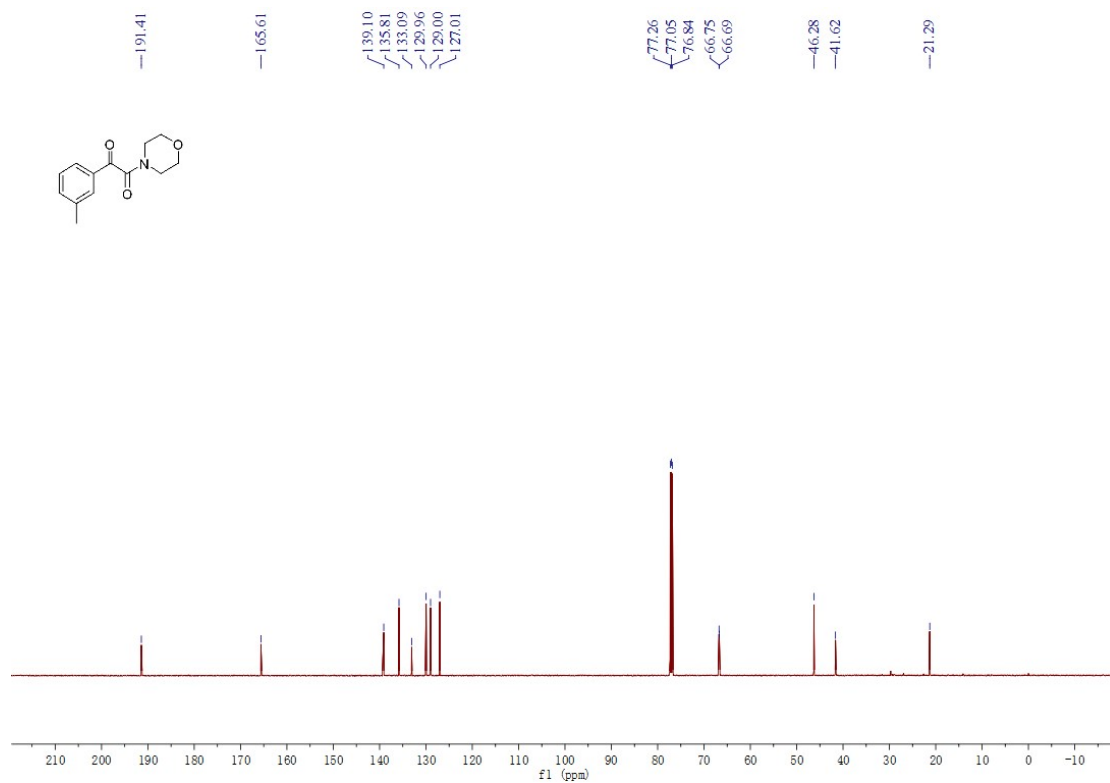

**3d** 1-morpholino-2-(p-tolyl)ethane-1,2-dione

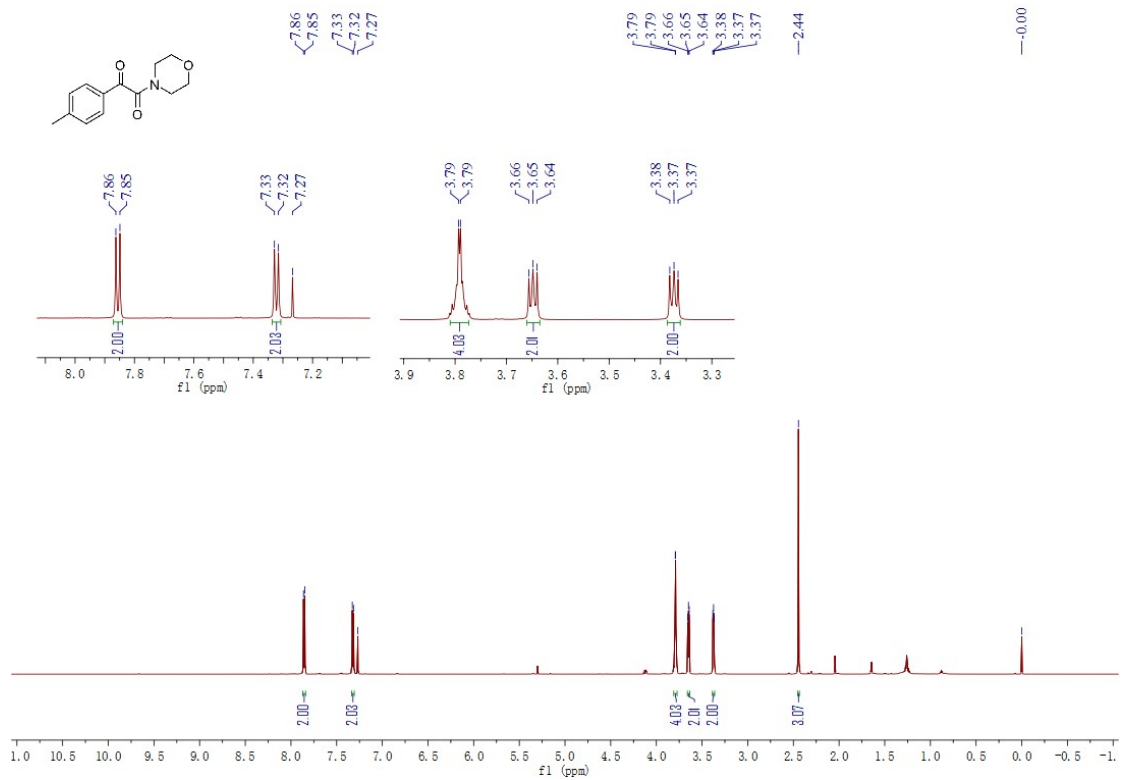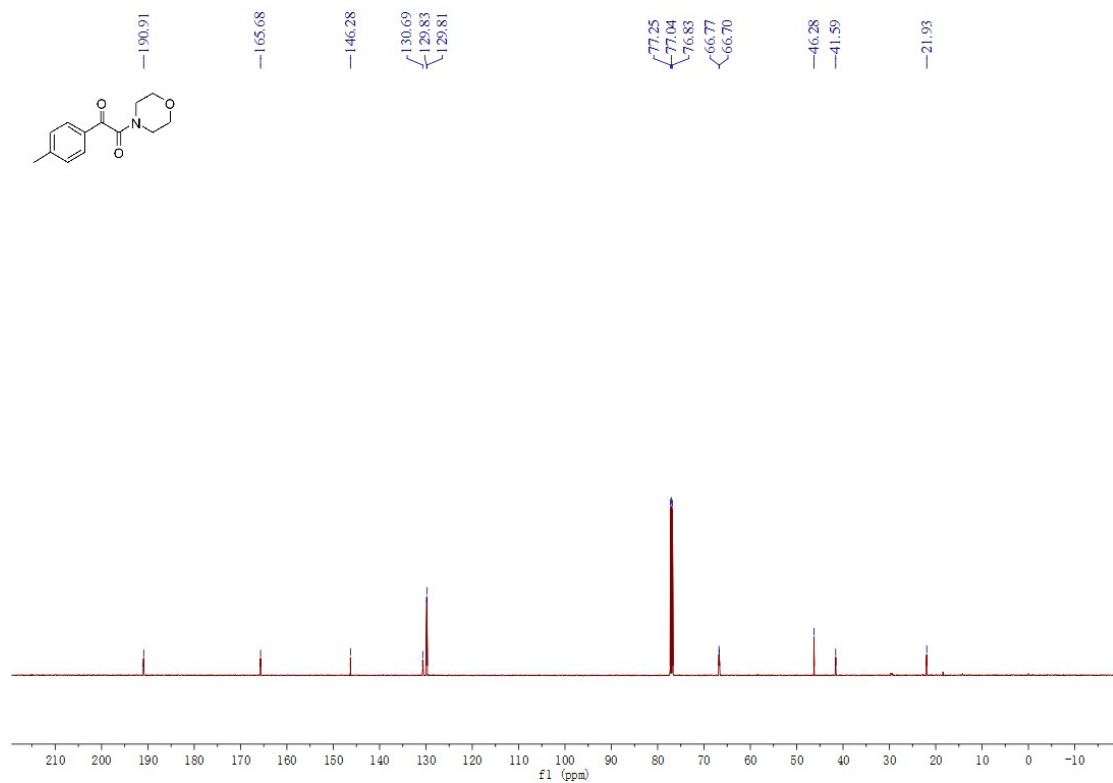

**3e** 1-(2-bromophenyl)-2-morpholinoethane-1,2-dione

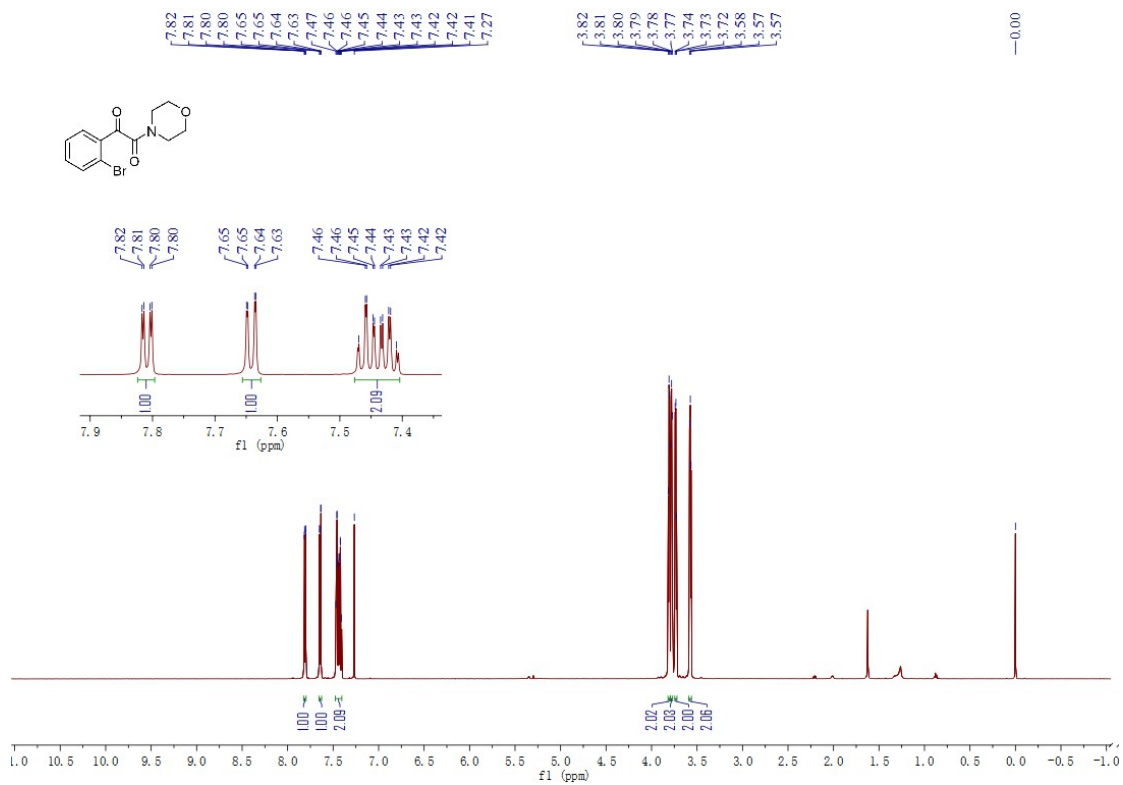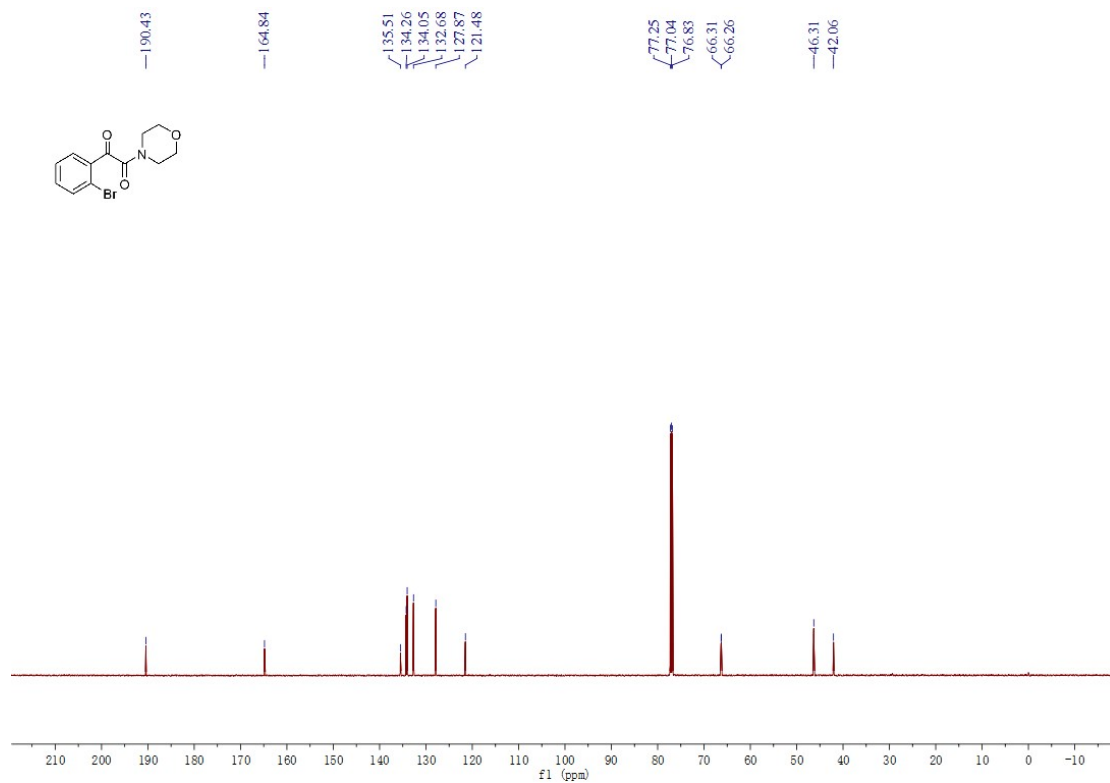

**3f** 1-(3-bromophenyl)-2-morpholinoethane-1,2-dione

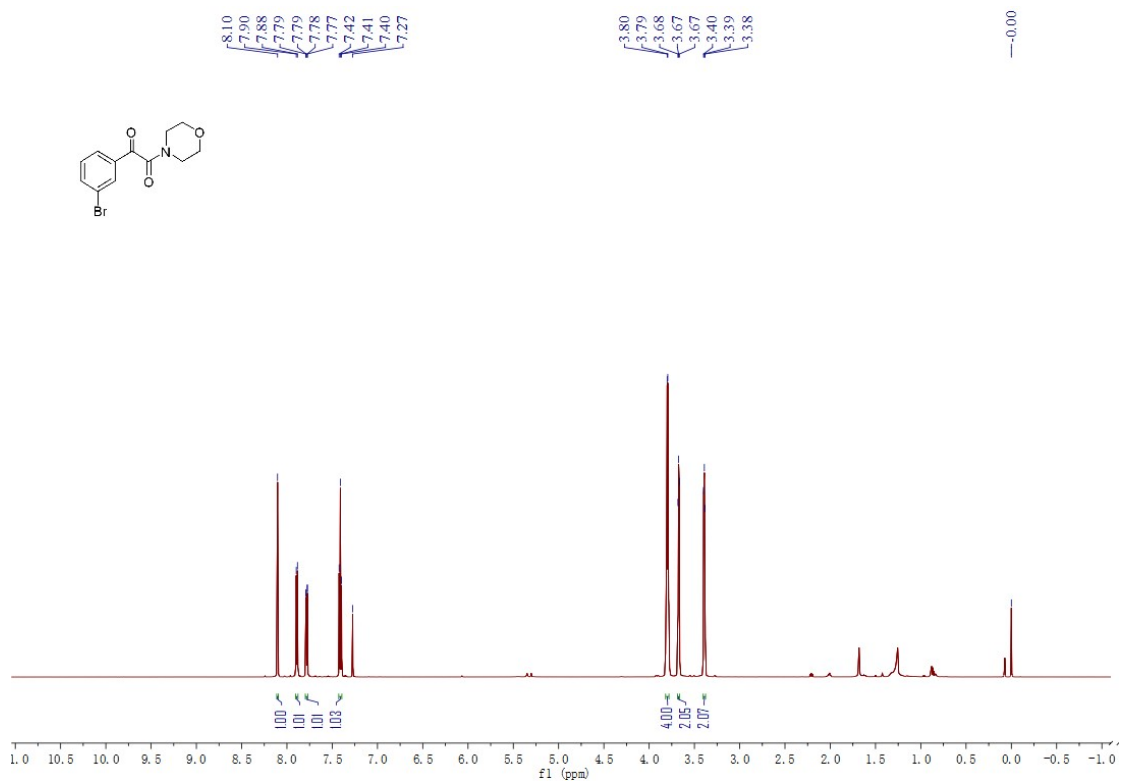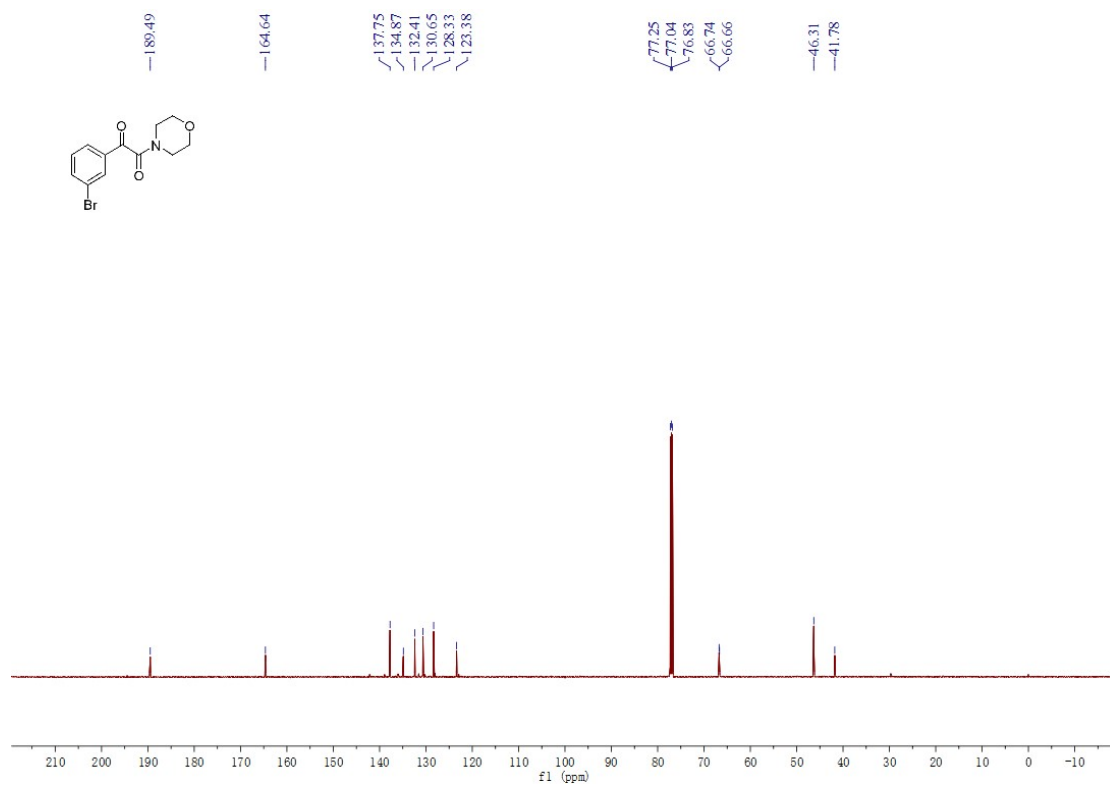

**3g** 1-(4-bromophenyl)-2-morpholinoethane-1,2-dione

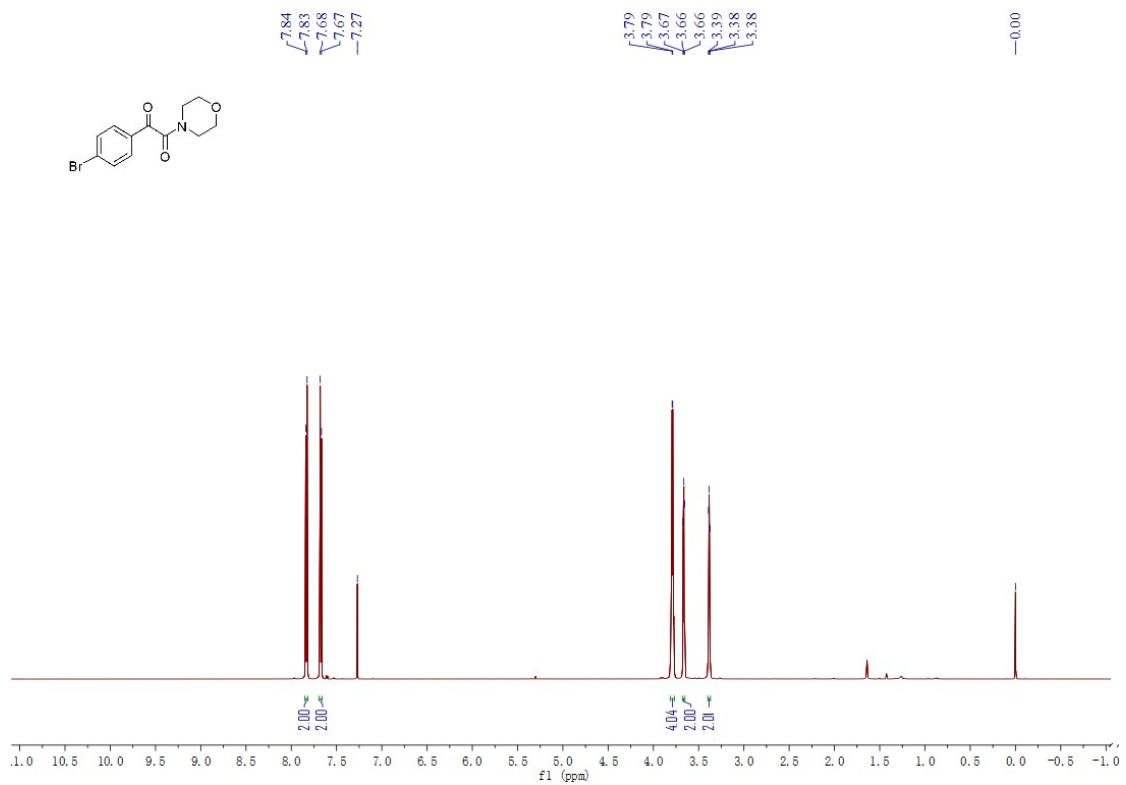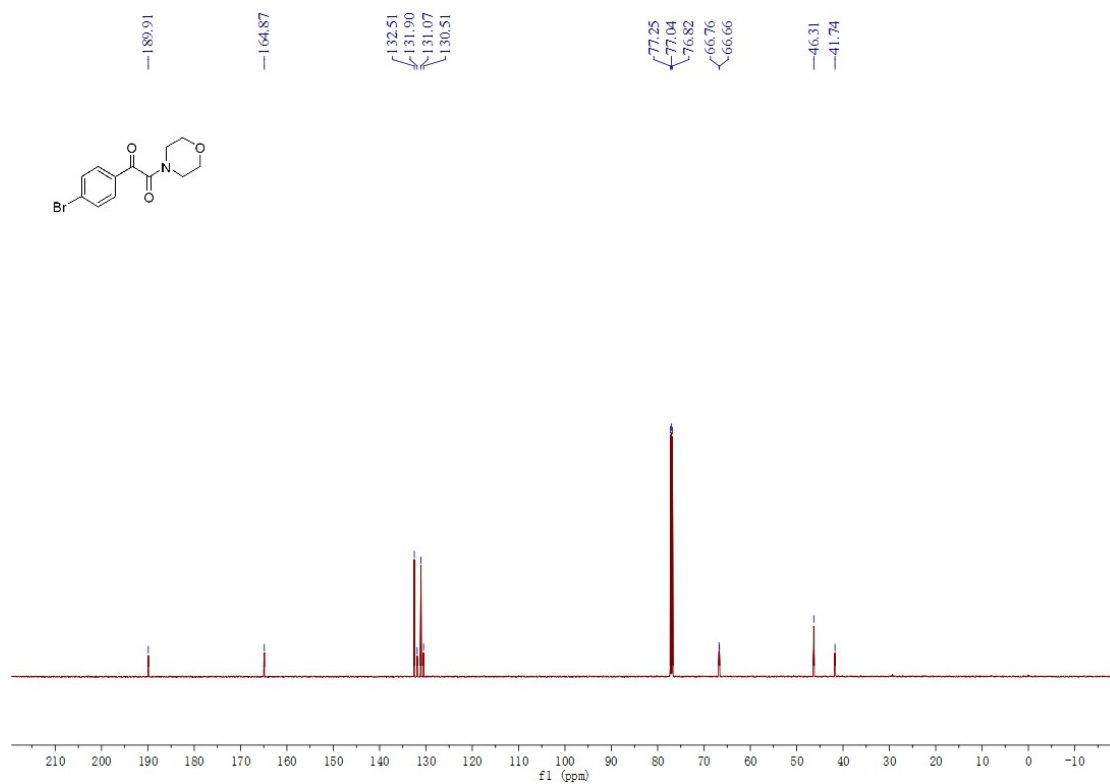

**3h** 1-morpholino-2-(naphthalen-2-yl)ethane-1,2-dione

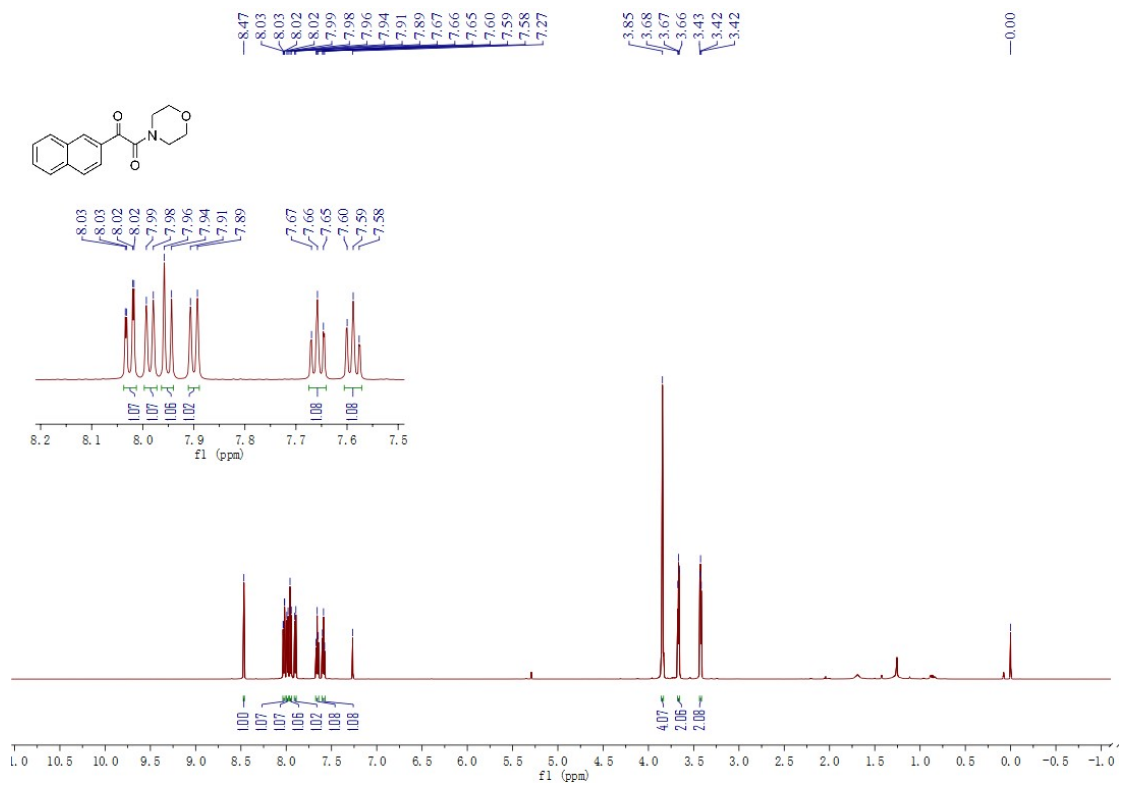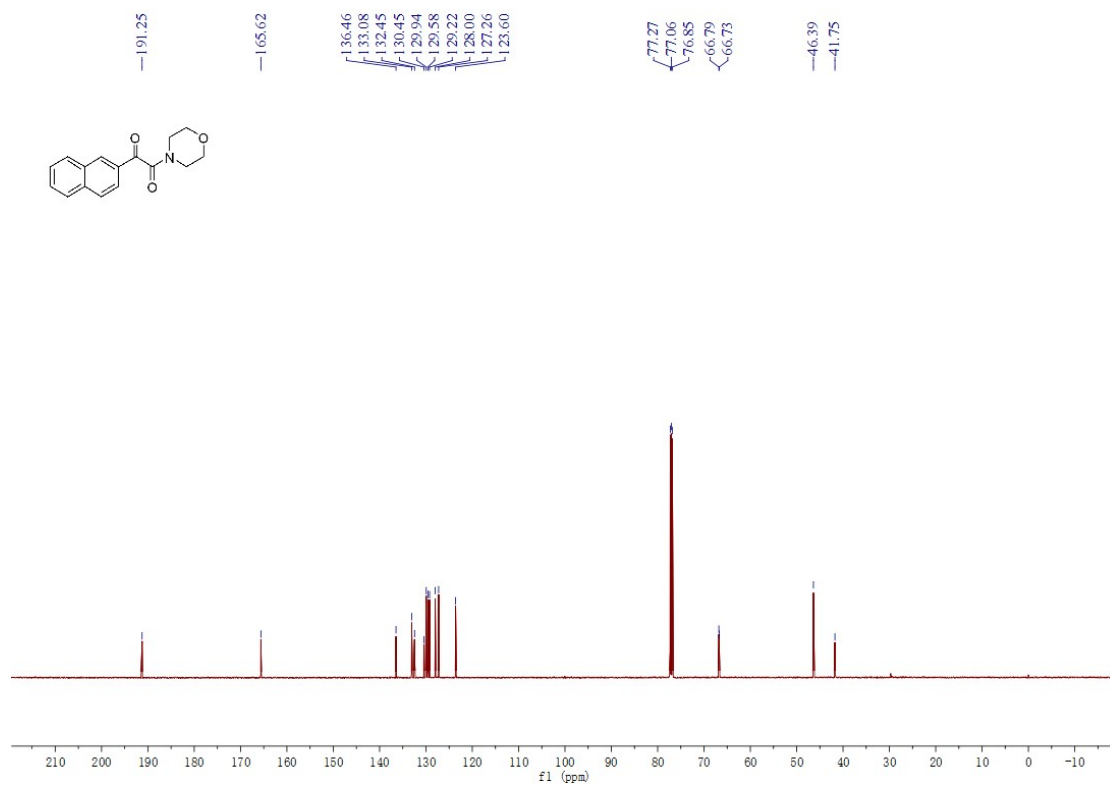

**3i** 1-morpholino-2-(thiophen-2-yl)ethane-1,2-dione



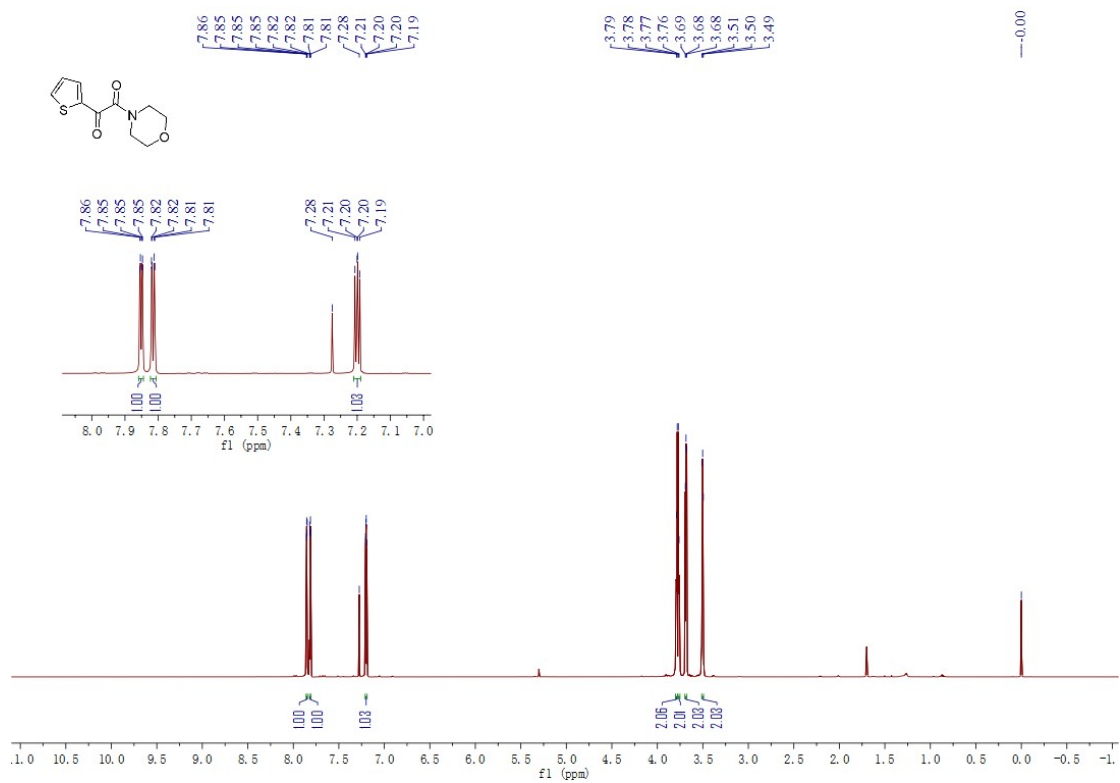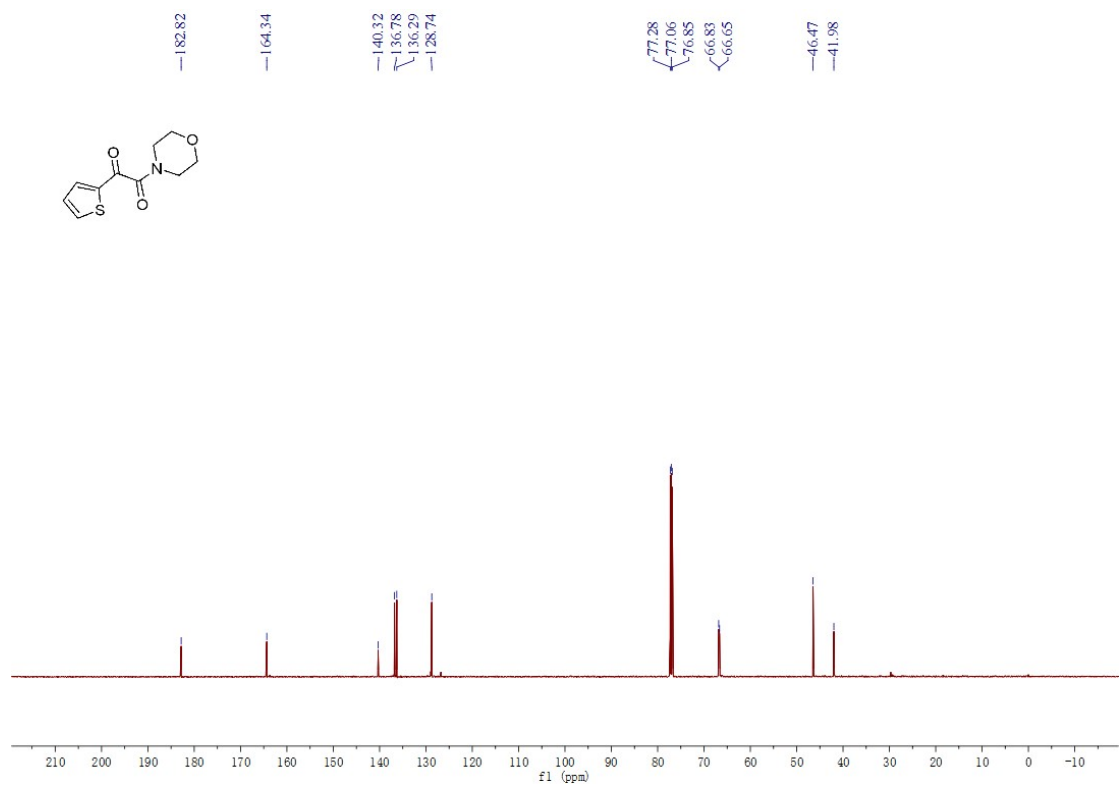

**3j** 1-phenyl-2-(piperidin-1-yl)ethane-1,2-dione

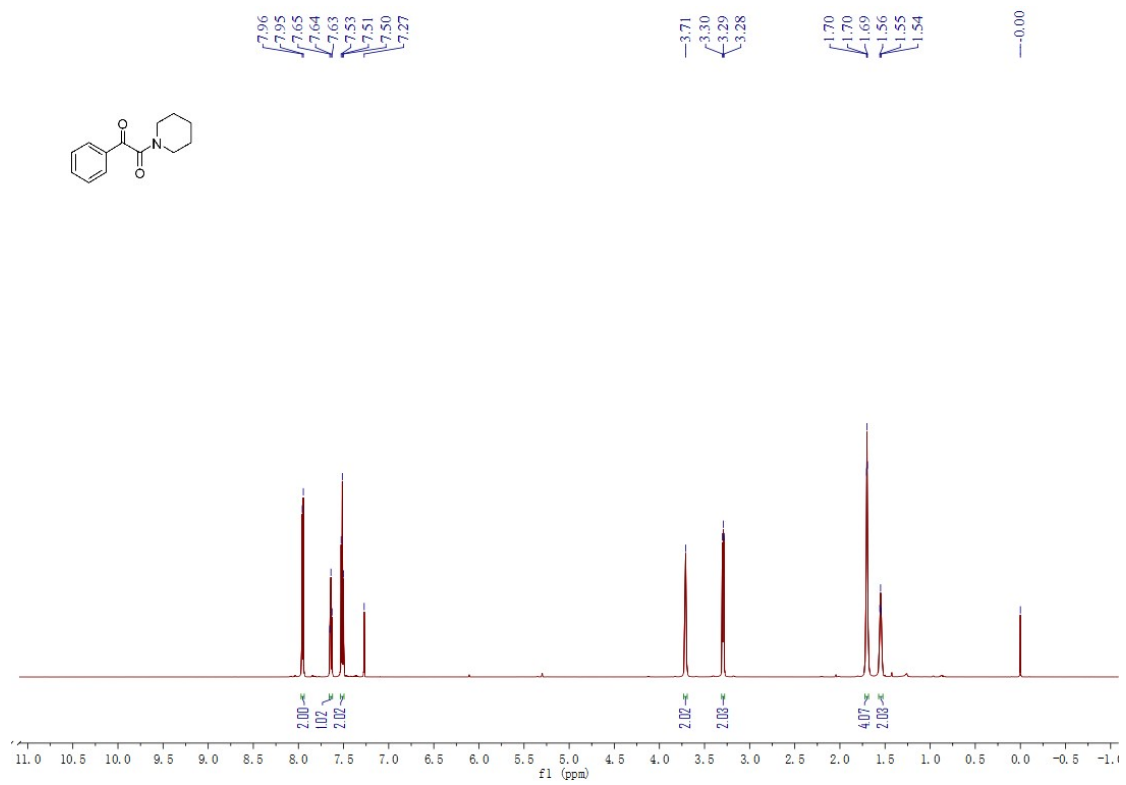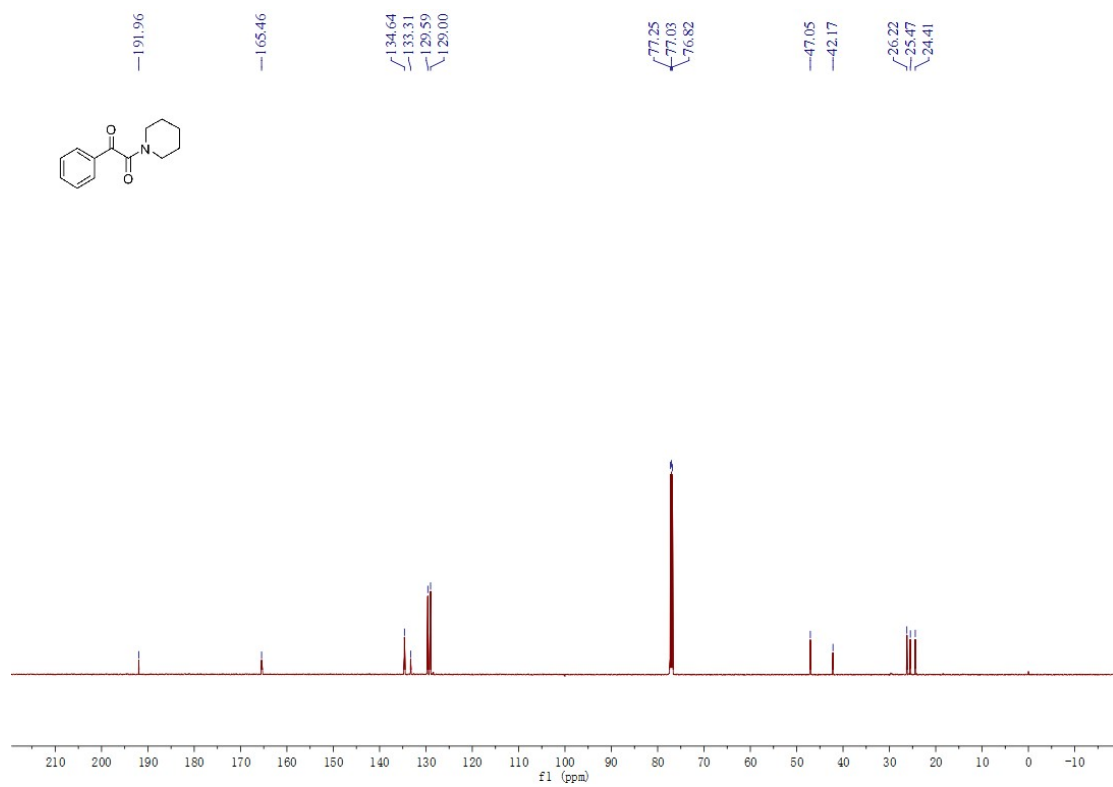

**3k** 1-(4-methylpiperidin-1-yl)-2-phenylethane-1,2-dione

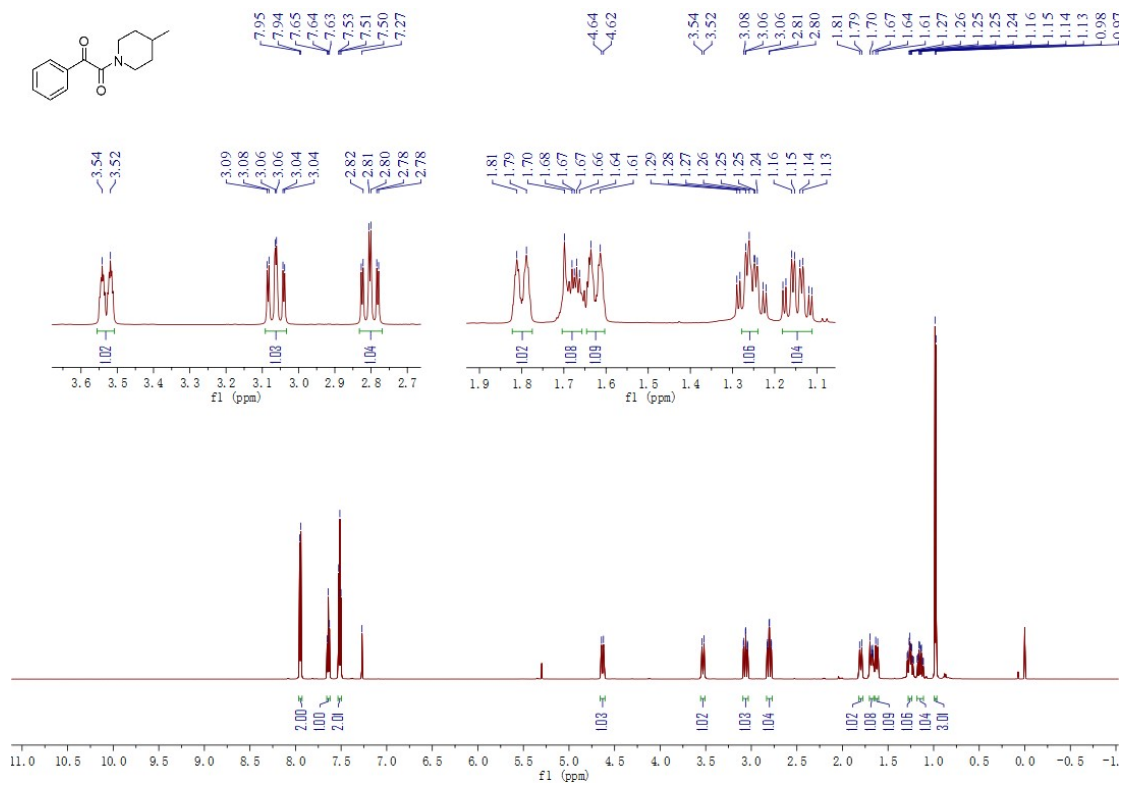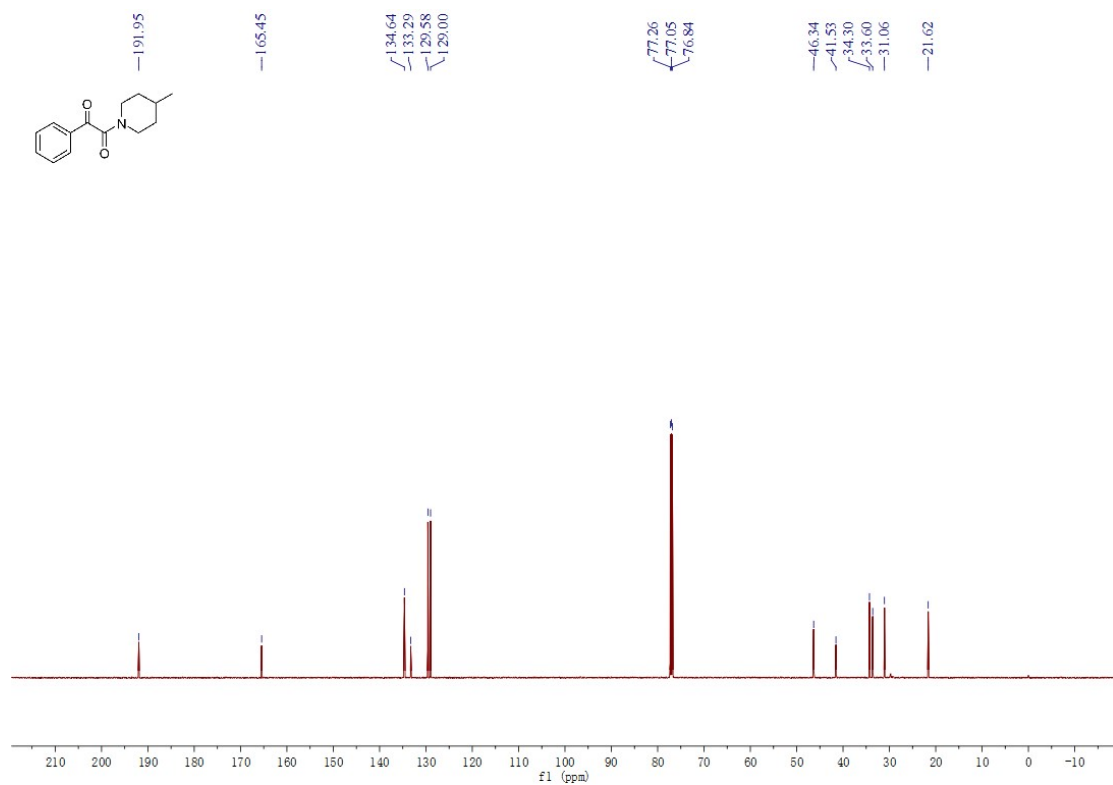

31 N,N-diethyl-2-oxo-2-phenylacetamide

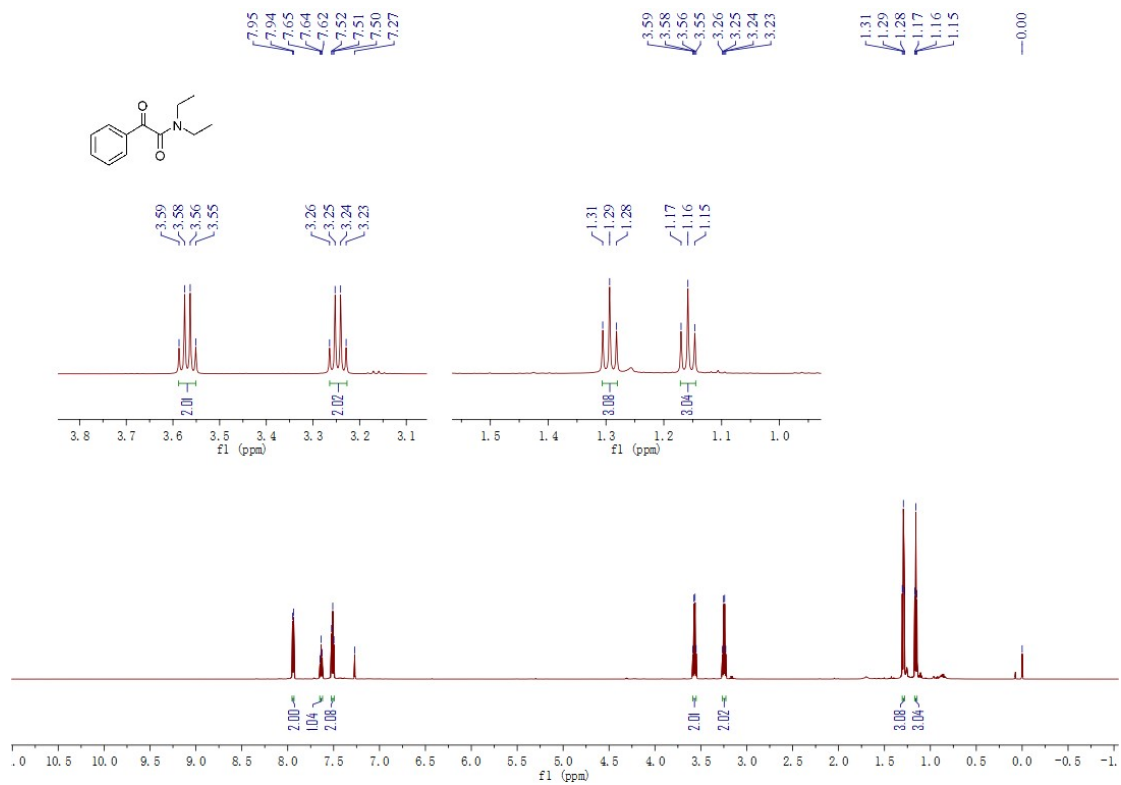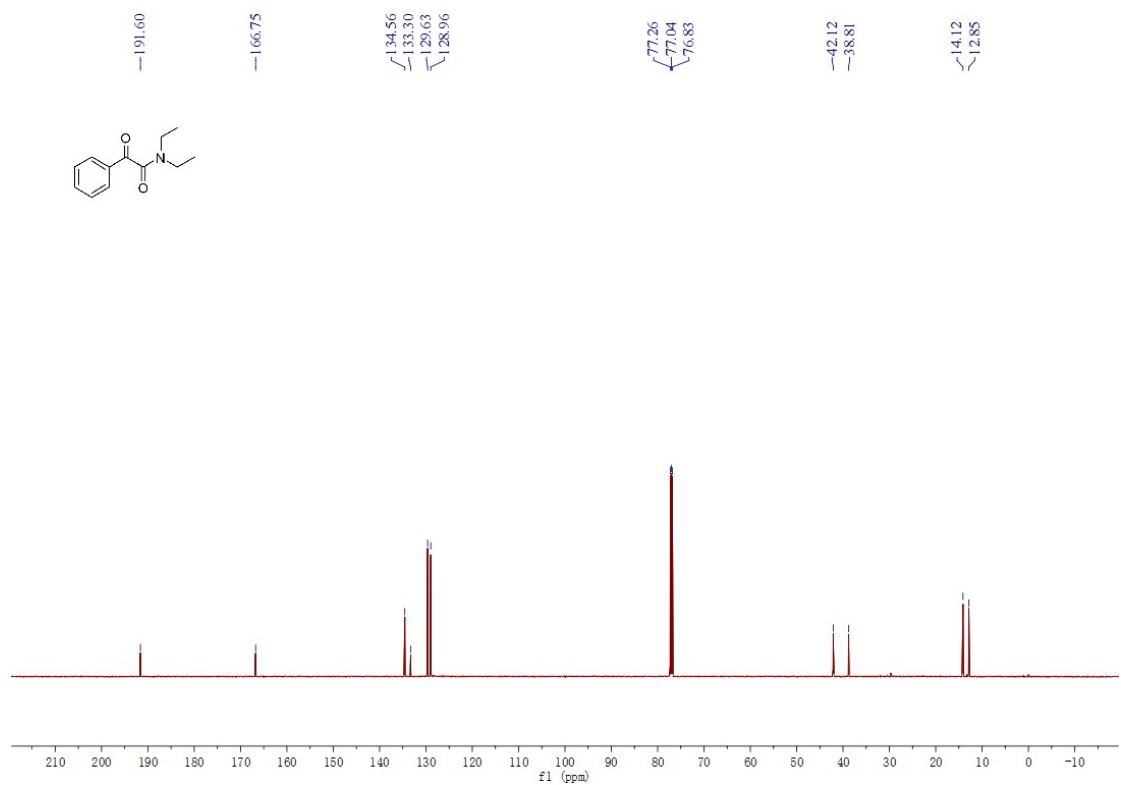

**3m** 1-(naphthalen-2-yl)-2-(piperidin-1-yl)ethane-1,2-dione

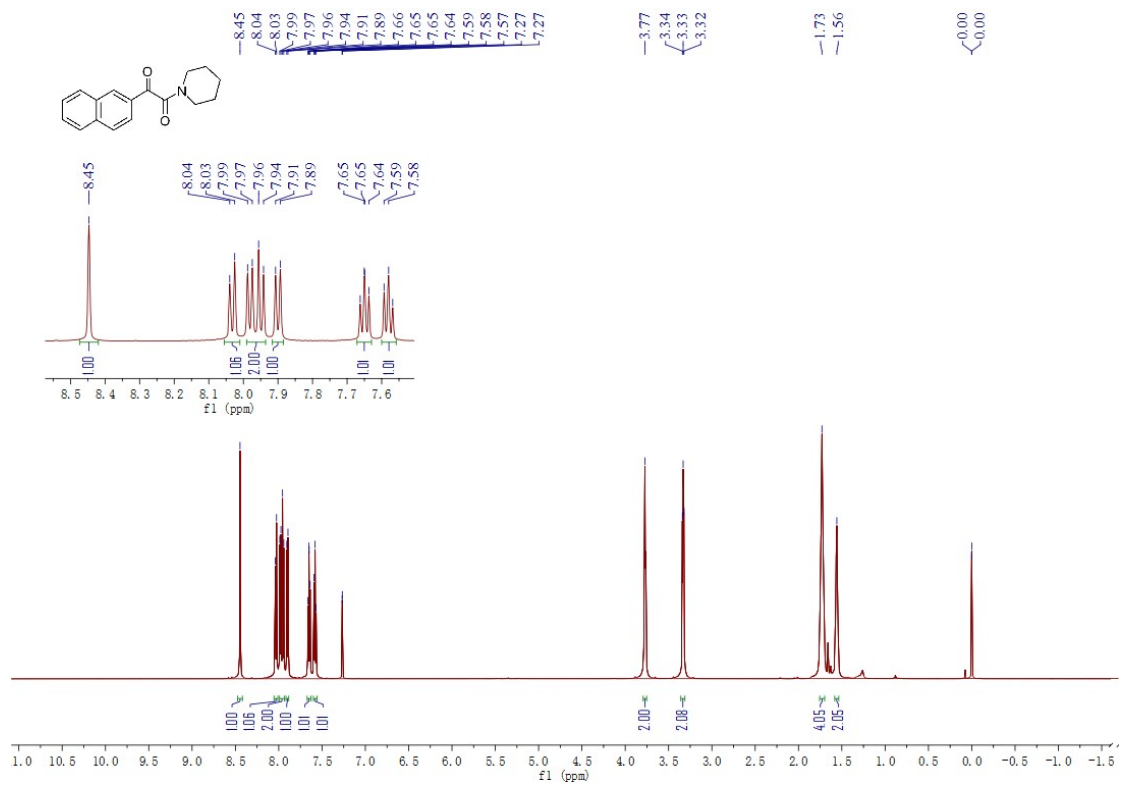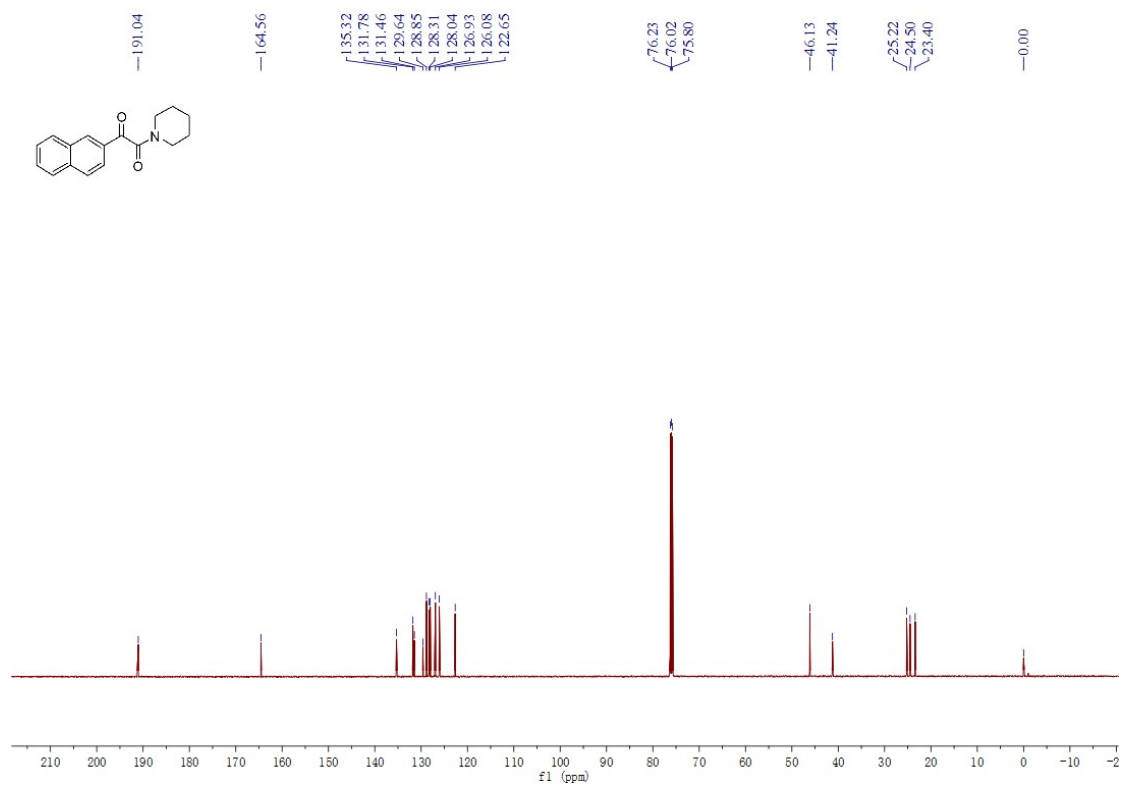

**3n** 1-(4-methylpiperidin-1-yl)-2-(naphthalen-2-yl)ethane-1,2-dione

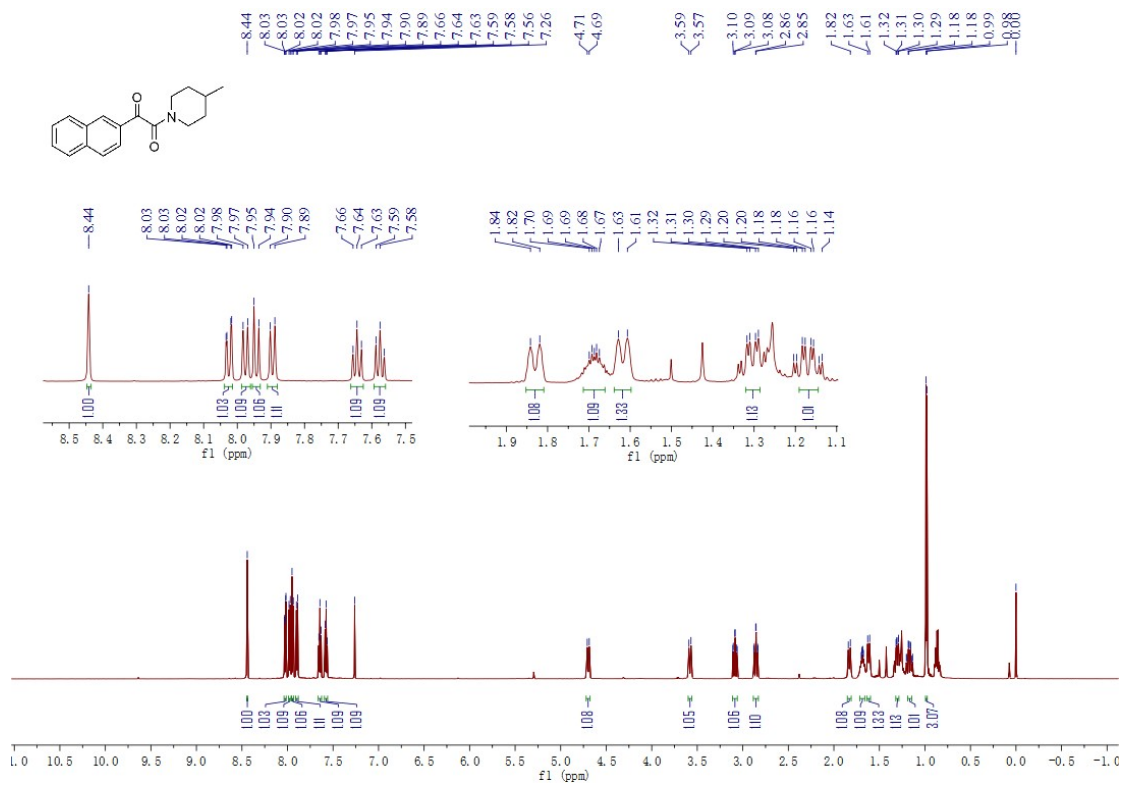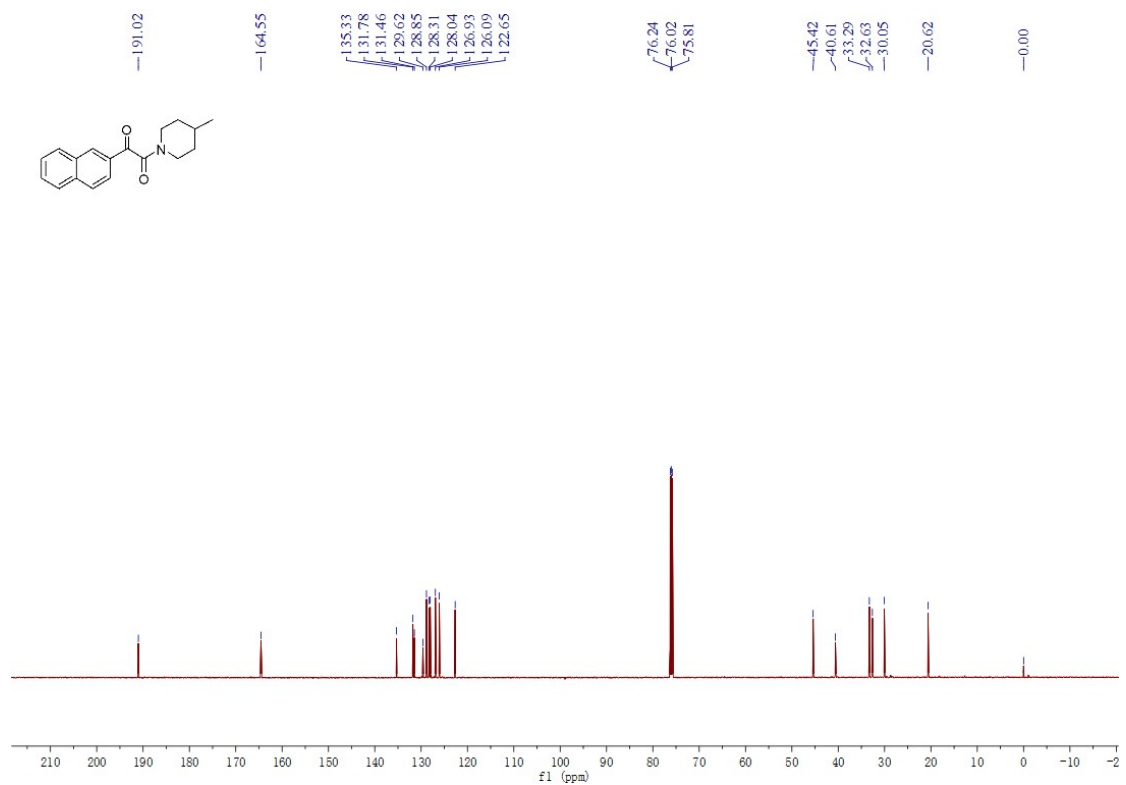

**30** N,N-diethyl-2-(naphthalen-2-yl)-2-oxoacetamide

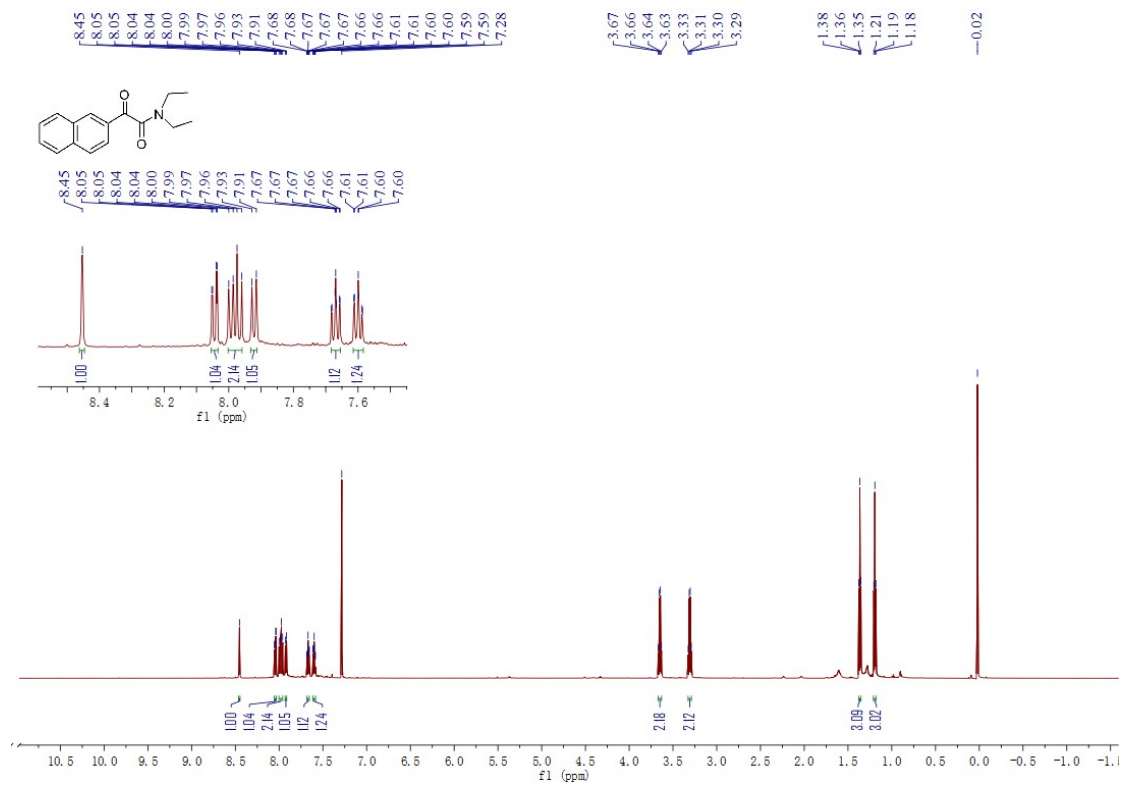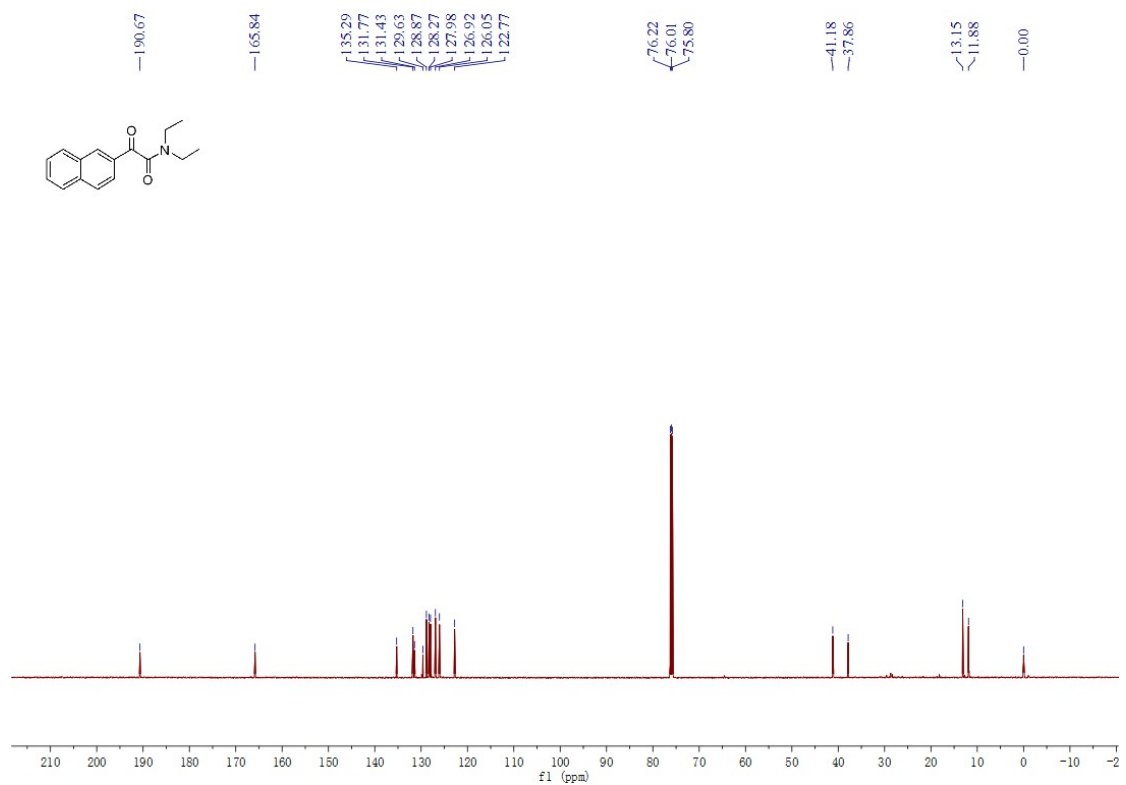

**3p** 1-(naphthalen-2-yl)-2-(pyrrolidin-1-yl)ethane-1,2-dione

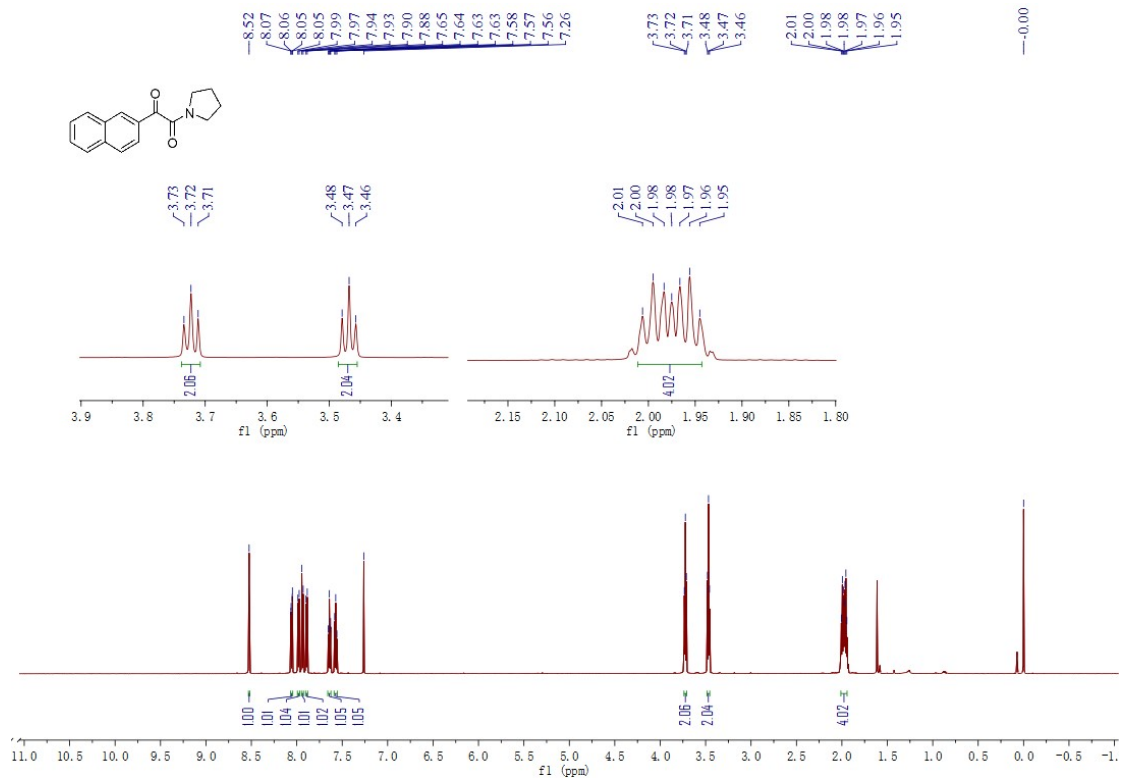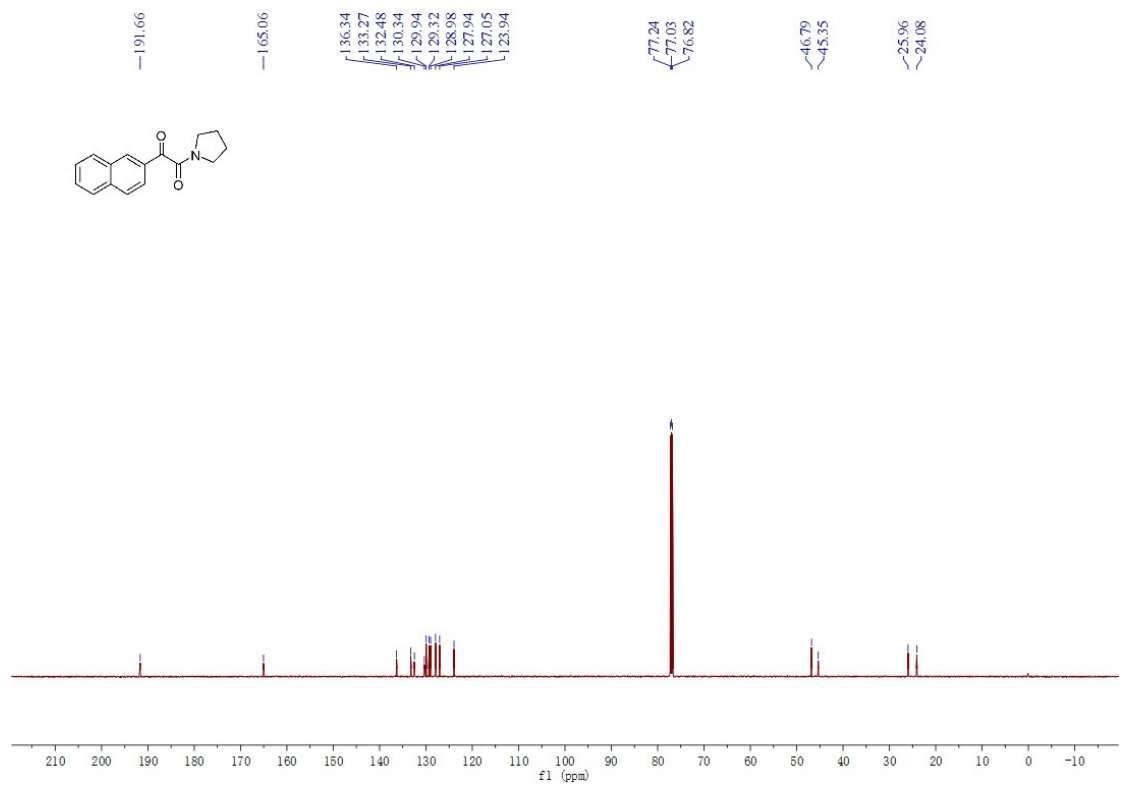



## 6. References

- [1] P. H. Li, Z. Wang, H. Fu, Q. P. Dai, C. W. Hu. *Chem. Comm.*, 2018, **54**, 12471-12474.
- [2] X. Zhang, M. Wang, Y. Zhang, L. Wang. *RSC Adv.*, 2013, **3**, 1311-1316.
- [3] C. Liu, Z. Yang, S. Guo, Y. Zeng, N. Zhu, X. Li, Z. Fang, K. Guo. *Org. Biomol. Chem.*, 2016, **14**, 8570-8575.
- [4] R.-H. Liu, D. Wei, B. Han, W. Yu. *ACS Catal.*, 2016, **6**, 6525-6530.
- [5] S. Nekkanti, K. Veeramani, N. *Green Chem.*, 2016, **18**, 3439-3447.
